# Supplementary material for: Extraction of Antioxidants from Brown Macroalgae Fucus spiralis
Source: MDPI journal article supplement (doi:10.3390/molecules29102271), 2024-05-11
Supplement: s1 [file s1]

# Extraction of Antioxidants from Brown Macroalgae *Fucus spiralis*

André Horta <sup>1,2,3,†</sup>, Ana M. Duarte <sup>1,†</sup>, Sónia Barroso <sup>1,\*</sup>, Filipa R. Pinto <sup>1</sup>, Susana Mendes <sup>1</sup>, Vasco Lima <sup>4</sup>, Jorge A. Saraiva <sup>4</sup> and Maria M. Gil <sup>1,\*</sup>

<sup>1</sup> MARE—Marine and Environmental Sciences Centre/ARNET—Aquatic Research Network, School of Tourism and Maritime Technology, Polytechnic of Leiria, Cetemares, 2520-620 Peniche, Portugal; filipa.pinto@ipleiria.pt (F.R.P.)

<sup>2</sup> Division of Aquaculture, Upgrading and Bioprospection, Portuguese Institute for the Sea and Atmosphere (IPMA), Avenida Magalhães Ramalho, 6, 1495-165 Lisboa, Portugal

<sup>3</sup> Research Institute for Medicines, Faculty of Pharmacy, University of Lisbon, Avenida Professor Gama Pinto, 1649-003 Lisbon, Portugal

<sup>4</sup> LAQV-REQUIMTE, Department of Chemistry, University of Aveiro, 3810-193 Aveiro, Portugal

\* Correspondence: sonia.barroso@ipleiria.pt (S.B.); maria.m.gil@ipleiria.pt (M.M.G.)

† These authors contributed equally to this work.

## Table of Contents

1. Experimental design and Response Surface Methodology (RSM)
2. Statistical analysis
  - 2.1. Vortex
  - 2.2. Ultra-Turrax® homogenizer
  - 2.3. Ultrasonic bath
  - 2.4. Ultrasonic probe
  - 2.5. High pressure

## 1. Experimental design and Response Surface Methodology (RSM)

**Table S1.** Coded and decoded levels of the independent variables used for the extraction of antioxidants from *Fucus spiralis*, with the different extraction methods (vortex, Ultra-Turrax® homogenizer, ultrasonic bath and ultrasonic probe).

| Run    | Coded levels |          |          | Decoded Conditions |       |       |
|--------|--------------|----------|----------|--------------------|-------|-------|
|        | A            | B        | C        | t (s)              | R (g) | S (%) |
| 1      | -1.00000     | -1.00000 | -1.00000 | 84,7               | 11,7  | 20,3  |
| 2      | -1.00000     | -1.00000 | 1.00000  | 84,7               | 11,7  | 79,7  |
| 3      | -1.00000     | 1.00000  | -1.00000 | 84,7               | 40,3  | 20,3  |
| 4      | -1.00000     | 1.00000  | 1.00000  | 84,7               | 40,3  | 79,7  |
| 5      | 1.00000      | -1.00000 | -1.00000 | 245,3              | 11,7  | 20,3  |
| 6      | 1.00000      | -1.00000 | 1.00000  | 245,3              | 11,7  | 79,7  |
| 7      | 1.00000      | 1.00000  | -1.00000 | 245,3              | 40,3  | 20,3  |
| 8      | 1.00000      | 1.00000  | 1.00000  | 245,3              | 40,3  | 79,7  |
| 9      | -1.68179     | 0.00000  | 0.00000  | 30,0               | 26,0  | 50,0  |
| 10     | 1.68179      | 0.00000  | 0.00000  | 300,0              | 26,0  | 50,0  |
| 11     | 0.00000      | -1.68179 | 0.00000  | 165,0              | 2,0   | 50,0  |
| 12     | 0.00000      | 1.68179  | 0.00000  | 165,0              | 50,0  | 50,0  |
| 13     | 0.00000      | 0.00000  | -1.68179 | 165,0              | 26,0  | 0,0   |
| 14     | 0.00000      | 0.00000  | 1.68179  | 165,0              | 26,0  | 100,0 |
| 15 (C) | 0.00000      | 0.00000  | 0.00000  | 165,0              | 26,0  | 50,0  |
| 16 (C) | 0.00000      | 0.00000  | 0.00000  | 165,0              | 26,0  | 50,0  |

C – Central point

**Table S2.** Coded and decoded levels of the independent variables used for the extraction of antioxidants from *Fucus spiralis*, using high pressure.

| Run    | Coded levels |       |       | Decoded Conditions |         |       |
|--------|--------------|-------|-------|--------------------|---------|-------|
|        | A            | B     | C     | t (s)              | P (MPa) | S (%) |
| 1      | -1,00        | -1,00 | -1,00 | 603,6              | 121,5   | 20,2  |
| 2      | 1,00         | -1,00 | -1,00 | 1496,4             | 121,5   | 20,2  |
| 3      | -1,00        | 1,00  | -1,00 | 603,6              | 478,6   | 20,2  |
| 4      | 1,00         | 1,00  | -1,00 | 1496,4             | 478,6   | 20,2  |
| 5      | -1,00        | -1,00 | 1,00  | 603,6              | 121,5   | 79,8  |
| 6      | 1,00         | -1,00 | 1,00  | 1496,4             | 121,5   | 79,8  |
| 7      | -1,00        | 1,00  | 1,00  | 603,6              | 478,6   | 79,8  |
| 8      | 1,00         | 1,00  | 1,00  | 1496,4             | 478,6   | 79,8  |
| 9      | -1,68        | 0,00  | 0,00  | 300,0              | 300,1   | 50,0  |
| 10     | 1,68         | 0,00  | 0,00  | 1800,0             | 300,1   | 50,0  |
| 11     | 0,00         | -1,68 | 0,00  | 1050,0             | 0,1     | 50,0  |
| 12     | 0,00         | 1,68  | 0,00  | 1050,0             | 600,0   | 50,0  |
| 13     | 0,00         | 0,00  | -1,68 | 1050,0             | 300,1   | 0,0   |
| 14     | 0,00         | 0,00  | 1,68  | 1050,0             | 300,1   | 100,0 |
| 15 (C) | 0,00         | 0,00  | 0,00  | 1050,0             | 300,1   | 50,0  |
| 16 (C) | 0,00         | 0,00  | 0,00  | 1050,0             | 300,1   | 50,0  |
| 17 (C) | 0,00         | 0,00  | 0,00  | 1050,0             | 300,1   | 50,0  |
| 18 (C) | 0,00         | 0,00  | 0,00  | 1050,0             | 300,1   | 50,0  |
| 19 (C) | 0,00         | 0,00  | 0,00  | 1050,0             | 300,1   | 50,0  |
| 20 (C) | 0,00         | 0,00  | 0,00  | 1050,0             | 300,1   | 50,0  |

C – Central point

## 2. Statistical analysis

### 2.1. Vortex

**Table S3.** Analysis of variance (ANOVA) of the second-order polynomial model for optimization of the extraction of antioxidants from *F. spiralis*, using vortex-assisted extraction. t: extraction time (s); R: biomass:solvent ratio (g biomass/100 mL solvent); S: solvent (% of water in water:ethanol mixture); SS: Sum of squares; df: Degree of freedom; MS: Mean square; F: F value; p: probability; L: Linear effect; Q: Quadratic effect; 1Lby2L: interaction between the linear effect of t and the linear effect of R; 1Lby3L: interaction between the linear effect of t and the linear effect of S; 2Lby3L: interaction between the linear effect of R and the linear effect of S. Significant parameters are presented in red.

|             | <i>DPPH</i> |    |       |        |       | <i>FRAP</i> |    |          |          |       | <i>TPC</i> |    |         |       |       |
|-------------|-------------|----|-------|--------|-------|-------------|----|----------|----------|-------|------------|----|---------|-------|-------|
|             | SS          | df | MS    | F      | p     | SS          | df | MS       | F        | p     | SS         | df | MS      | F     | p     |
| (1)t (L)    | 28,23       | 1  | 28,23 | 305,35 | 0,036 | 12,2        | 1  | 12,17    | 6,31     | 0,241 | 2066,60    | 1  | 2066,60 | 6,39  | 0,240 |
| t (Q)       | 12,49       | 1  | 12,49 | 135,15 | 0,055 | 365,7       | 1  | 365,71   | 189,50   | 0,046 | 103,79     | 1  | 103,79  | 0,32  | 0,672 |
| (2)R (L)    | 35,25       | 1  | 35,25 | 381,29 | 0,033 | 53168,1     | 1  | 53168,14 | 27550,51 | 0,004 | 5224,04    | 1  | 5224,04 | 16,16 | 0,155 |
| R (Q)       | 0,55        | 1  | 0,55  | 5,92   | 0,248 | 494,4       | 1  | 494,40   | 256,18   | 0,040 | 260,09     | 1  | 260,09  | 0,80  | 0,535 |
| (3)S (L)    | 40,15       | 1  | 40,15 | 434,25 | 0,031 | 44342,4     | 1  | 44342,44 | 22977,24 | 0,004 | 8461,26    | 1  | 8461,26 | 26,18 | 0,123 |
| S (Q)       | 0,08        | 1  | 0,08  | 0,89   | 0,518 | 33,8        | 1  | 33,82    | 17,52    | 0,149 | 2,24       | 1  | 2,24    | 0,01  | 0,947 |
| 1L by 2L    | 0,87        | 1  | 0,87  | 9,46   | 0,200 | 5428,4      | 1  | 5428,37  | 2812,86  | 0,012 | 512,81     | 1  | 512,81  | 1,59  | 0,427 |
| 1L by 3L    | 1,93        | 1  | 1,93  | 20,83  | 0,137 | 236,8       | 1  | 236,78   | 122,70   | 0,057 | 16,21      | 1  | 16,21   | 0,05  | 0,860 |
| 2L by 3L    | 0,62        | 1  | 0,62  | 6,75   | 0,234 | 678,7       | 1  | 678,70   | 351,69   | 0,034 | 2300,23    | 1  | 2300,23 | 7,12  | 0,228 |
| Lack of Fit | 110,74      | 5  | 22,15 | 239,57 | 0,049 | 4720,8      | 5  | 944,17   | 489,25   | 0,034 | 5580,00    | 5  | 1116,00 | 3,45  | 0,386 |
| Pure Error  | 0,09        | 1  | 0,09  |        |       | 1,9         | 1  | 1,93     |          |       | 323,20     | 1  | 323,20  |       |       |
| Total SS    | 232,34      | 15 |       |        |       | 109634,6    | 15 |          |          |       | 24811,34   | 15 |         |       |       |
| $R^2$       |             |    | 0,523 |        |       |             |    | 0,957    |          |       |            |    | 0,762   |       |       |
| $R^2 adj.$  |             |    | 0,000 |        |       |             |    | 0,892    |          |       |            |    | 0,405   |       |       |

**Table S4.** Effect estimates of variables in vortex-assisted extraction. t: extraction time (s); R: biomass:solvent ratio (g biomass/100 mL solvent); S: solvent (% of water in water:ethanol mixture); L: Linear effect; Q: Quadratic effect; 1Lby2L: interaction between the linear effect of t and the linear effect of R; 1Lby3L: interaction between the linear effect of t and the linear effect of S; 2Lby3L: interaction between the linear effect of R and the linear effect of S. Significant parameters are presented in red.

|      | Parameter    | Effect  | Std.Err. - Pure Err | t(1)    | p     | -95,% - Cnf.Limt | +95,% - Cnf.Limt | Coeff. | Std.Err. - Coeff. | -95,% - Cnf.Limt | +95,% - Cnf.Limt |
|------|--------------|---------|---------------------|---------|-------|------------------|------------------|--------|-------------------|------------------|------------------|
| DPPH | Mean/Interc. | 4,35    | 0,21                | 20,30   | 0,031 | 1,63             | 7,08             | 4,35   | 0,21              | 1,63             | 7,08             |
|      | (1)t (L)     | 2,88    | 0,16                | 17,47   | 0,036 | 0,78             | 4,97             | 1,44   | 0,08              | 0,39             | 2,48             |
|      | t (Q)        | 2,32    | 0,20                | 11,63   | 0,055 | -0,22            | 4,86             | 1,16   | 0,10              | -0,11            | 2,43             |
|      | (2)R (L)     | -3,21   | 0,16                | -19,53  | 0,033 | -5,30            | -1,12            | -1,61  | 0,08              | -2,65            | -0,56            |
|      | R (Q)        | 0,49    | 0,20                | 2,43    | 0,248 | -2,05            | 3,02             | 0,24   | 0,10              | -1,03            | 1,51             |
|      | (3)S (L)     | 3,43    | 0,16                | 20,84   | 0,031 | 1,34             | 5,52             | 1,71   | 0,08              | 0,67             | 2,76             |
|      | S (Q)        | 0,19    | 0,20                | 0,95    | 0,518 | -2,35            | 2,73             | 0,09   | 0,10              | -1,17            | 1,36             |
|      | 1L by 2L     | -0,66   | 0,22                | -3,08   | 0,200 | -3,39            | 2,07             | -0,33  | 0,11              | -1,70            | 1,04             |
|      | 1L by 3L     | -0,98   | 0,22                | -4,56   | 0,137 | -3,71            | 1,75             | -0,49  | 0,11              | -1,86            | 0,88             |
|      | 2L by 3L     | -0,56   | 0,22                | -2,60   | 0,234 | -3,29            | 2,17             | -0,28  | 0,11              | -1,65            | 1,09             |
| FRAP | Mean/Interc. | 246,06  | 0,98                | 251,23  | 0,003 | 233,62           | 258,51           | 246,06 | 0,98              | 233,62           | 258,51           |
|      | (1)t (L)     | -1,89   | 0,75                | -2,51   | 0,241 | -11,44           | 7,67             | -0,94  | 0,38              | -5,72            | 3,83             |
|      | t (Q)        | -12,57  | 0,91                | -13,77  | 0,046 | -24,17           | -0,97            | -6,28  | 0,46              | -12,08           | -0,48            |
|      | (2)R (L)     | 124,79  | 0,75                | 165,98  | 0,004 | 115,24           | 134,34           | 62,40  | 0,38              | 57,62            | 67,17            |
|      | R (Q)        | -14,61  | 0,91                | -16,01  | 0,040 | -26,21           | -3,01            | -7,31  | 0,46              | -13,10           | -1,51            |
|      | (3)S (L)     | -113,96 | 0,75                | -151,58 | 0,004 | -123,52          | -104,41          | -56,98 | 0,38              | -61,76           | -52,21           |
|      | S (Q)        | 3,82    | 0,91                | 4,19    | 0,149 | -7,78            | 15,42            | 1,91   | 0,46              | -3,89            | 7,71             |
|      | 1L by 2L     | 52,10   | 0,98                | 53,04   | 0,012 | 39,62            | 64,58            | 26,05  | 0,49              | 19,81            | 32,29            |
|      | 1L by 3L     | -10,88  | 0,98                | -11,08  | 0,057 | -23,36           | 1,60             | -5,44  | 0,49              | -11,68           | 0,80             |
|      | 2L by 3L     | -18,42  | 0,98                | -18,75  | 0,034 | -30,90           | -5,94            | -9,21  | 0,49              | -15,45           | -2,97            |
| TPC  | Mean/Interc. | 91,01   | 12,67               | 7,18    | 0,088 | -70,04           | 252,06           | 91,01  | 12,67             | -70,04           | 252,06           |
|      | (1)t (L)     | -24,60  | 9,73                | -2,53   | 0,240 | -148,23          | 99,02            | -12,30 | 4,86              | -74,11           | 49,51            |
|      | t (Q)        | -6,69   | 11,81               | -0,57   | 0,672 | -156,79          | 143,41           | -3,35  | 5,91              | -78,40           | 71,70            |
|      | (2)R (L)     | 39,12   | 9,73                | 4,02    | 0,155 | -84,51           | 162,74           | 19,56  | 4,86              | -42,25           | 81,37            |
|      | R (Q)        | -10,60  | 11,81               | -0,90   | 0,535 | -160,70          | 139,50           | -5,30  | 5,91              | -80,35           | 69,75            |
|      | (3)S (L)     | -49,78  | 9,73                | -5,12   | 0,123 | -173,41          | 73,84            | -24,89 | 4,86              | -86,70           | 36,92            |
|      | S (Q)        | -0,98   | 11,81               | -0,08   | 0,947 | -151,08          | 149,12           | -0,49  | 5,91              | -75,54           | 74,56            |
|      | 1L by 2L     | 16,01   | 12,71               | 1,26    | 0,427 | -145,51          | 177,54           | 8,01   | 6,36              | -72,76           | 88,77            |
|      | 1L by 3L     | -2,85   | 12,71               | -0,22   | 0,860 | -164,37          | 158,68           | -1,42  | 6,36              | -82,19           | 79,34            |
|      | 2L by 3L     | -33,91  | 12,71               | -2,67   | 0,228 | -195,44          | 127,61           | -16,96 | 6,36              | -97,72           | 63,81            |

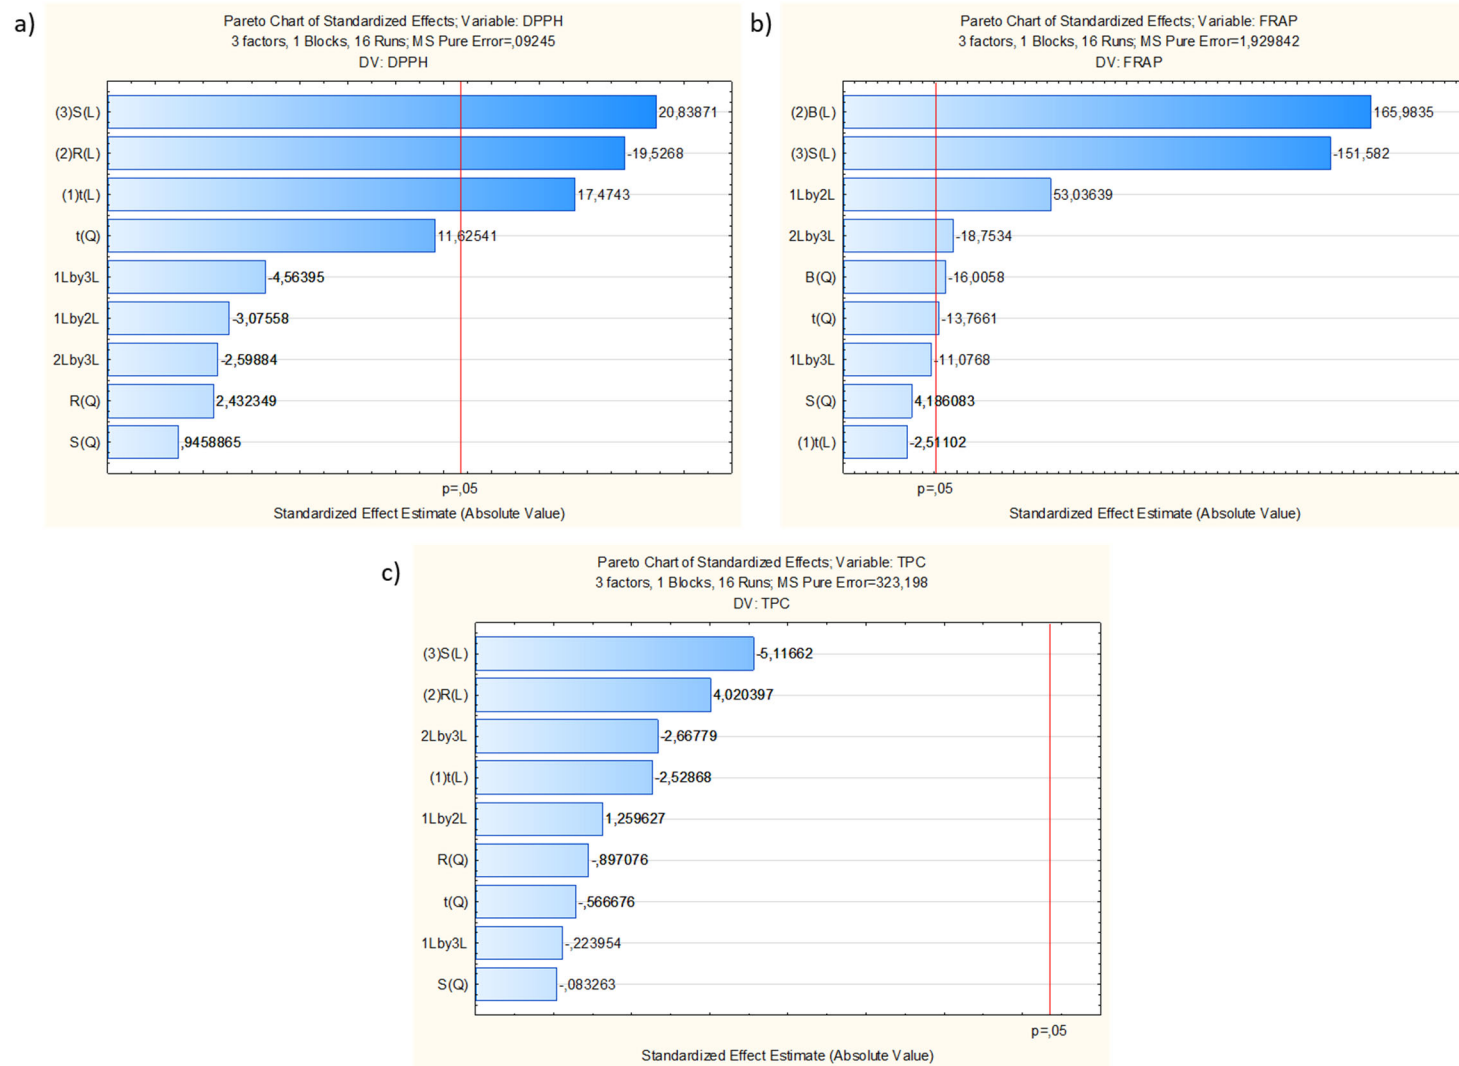

**Figure S1.** Pareto charts of the standardized effects of independent variables t, R and S in dependent variables DPPH (a), FRAP (b) and TPC (c) in the vortex-assisted extraction.

**Table S5.** Regression coefficients, standard error (SE) and *p*-value of the second-order polynomial models for optimization of the extraction of antioxidants from *F. spiralis*, using vortex-assisted extraction. t: extraction time (s); R: biomass:solvent ratio (g biomass/100 mL solvent); S: solvent (% of water in water:ethanol mixture); L: Linear effect; Q: Quadratic effect; 1Lby2L: interaction between the linear effect of t and the linear effect of R; 1Lby3L: interaction between the linear effect of t and the linear effect of S; 2Lby3L: interaction between the linear effect of R and the linear effect of S. Significant parameters are presented in red.

|          | <i>DPPH</i> |      |       |       |       |       | <i>FRAP</i> |      |        |       |        |        | <i>TPC</i> |       |       |       |         |        |
|----------|-------------|------|-------|-------|-------|-------|-------------|------|--------|-------|--------|--------|------------|-------|-------|-------|---------|--------|
|          | Coeff.      | SE   | t(1)  | p     | -95,% | +95,% | Coeff.      | SE   | t(1)   | p     | -95,%  | +95,%  | Coeff.     | SE    | t(1)  | p     | -95,%   | +95,%  |
| Interc.  | 3,63        | 0,93 | 3,90  | 0,160 | -8,18 | 15,44 | 235,29      | 4,25 | 55,39  | 0,011 | 181,31 | 289,26 | 62,51      | 54,97 | 1,14  | 0,459 | -636,00 | 761,01 |
| (1)t (L) | -0,02       | 0,01 | -3,85 | 0,162 | -0,10 | 0,05  | -0,17       | 0,03 | -5,92  | 0,107 | -0,53  | 0,19   | -0,13      | 0,37  | -0,37 | 0,777 | -4,78   | 4,51   |
| t (Q)    | 0,00        | 0,00 | 11,63 | 0,055 | 0,00  | 0,00  | 0,00        | 0,00 | -13,77 | 0,046 | 0,00   | 0,00   | 0,00       | 0,00  | -0,57 | 0,672 | -0,01   | 0,01   |
| (2)R (L) | -0,09       | 0,03 | -2,86 | 0,214 | -0,51 | 0,32  | 3,57        | 0,15 | 23,74  | 0,027 | 1,66   | 5,48   | 3,57       | 1,95  | 1,83  | 0,318 | -21,17  | 28,31  |
| R (Q)    | 0,00        | 0,00 | 2,43  | 0,248 | -0,01 | 0,01  | -0,04       | 0,00 | -16,01 | 0,040 | -0,06  | -0,01  | -0,03      | 0,03  | -0,90 | 0,535 | -0,40   | 0,34   |
| (3)S (L) | 0,10        | 0,02 | 6,41  | 0,099 | -0,10 | 0,29  | -1,19       | 0,07 | -17,06 | 0,037 | -2,08  | -0,30  | 0,36       | 0,90  | 0,39  | 0,761 | -11,14  | 11,85  |
| S (Q)    | 0,00        | 0,00 | 0,95  | 0,518 | 0,00  | 0,00  | 0,00        | 0,00 | 4,19   | 0,149 | 0,00   | 0,01   | 0,00       | 0,01  | -0,08 | 0,947 | -0,09   | 0,08   |
| 1L by 2L | 0,00        | 0,00 | -3,08 | 0,200 | 0,00  | 0,00  | 0,02        | 0,00 | 53,04  | 0,012 | 0,02   | 0,03   | 0,01       | 0,01  | 1,26  | 0,427 | -0,06   | 0,08   |
| 1L by 3L | 0,00        | 0,00 | -4,56 | 0,137 | 0,00  | 0,00  | 0,00        | 0,00 | -11,08 | 0,057 | 0,00   | 0,00   | 0,00       | 0,00  | -0,22 | 0,860 | -0,03   | 0,03   |
| 2L by 3L | 0,00        | 0,00 | -2,60 | 0,234 | 0,00  | 0,00  | -0,02       | 0,00 | -18,75 | 0,034 | -0,04  | -0,01  | -0,04      | 0,01  | -2,67 | 0,228 | -0,23   | 0,15   |

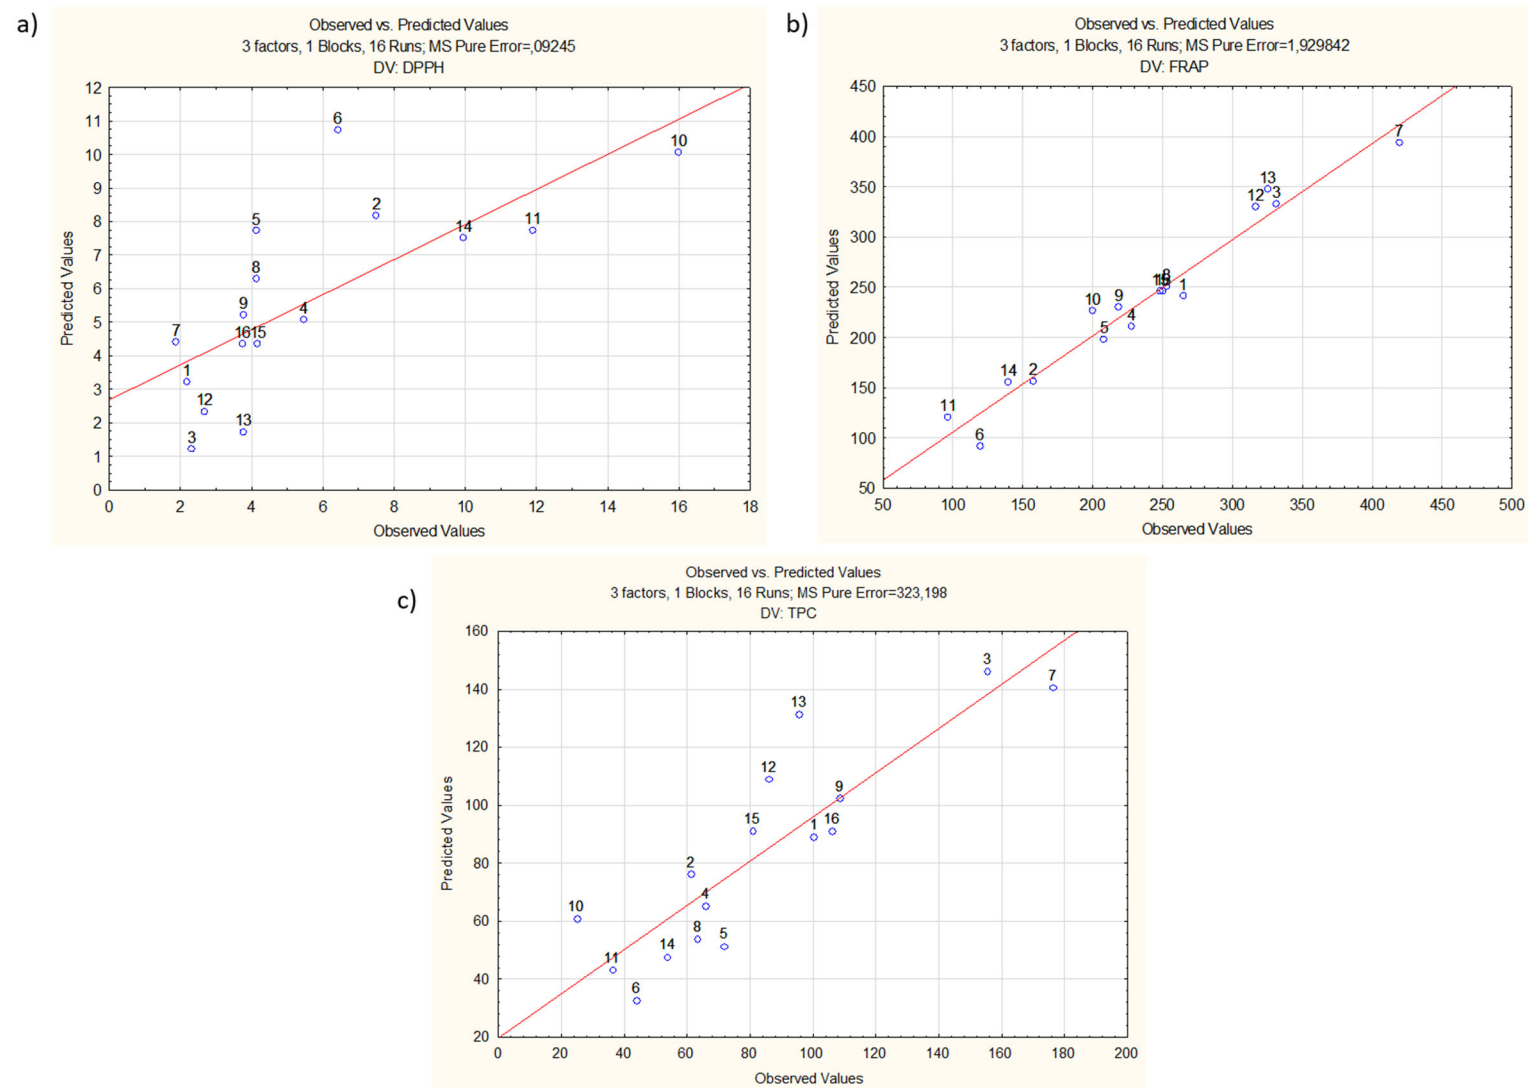

**Figure S2.** Observed vs. predicted DPPH (a), FRAP (b) and TPC (c) values for the vortex-assisted extraction.



**Table S6.** Observed, predicted, and residual values for the vortex-assisted extraction.

|    | <i>DPPH</i> |          |        | <i>FRAP</i> |          |        | <i>TPC</i> |          |        |
|----|-------------|----------|--------|-------------|----------|--------|------------|----------|--------|
|    | Observed    | Predictd | Resids | Observed    | Predictd | Resids | Observed   | Predictd | Resids |
| 1  | 2,19        | 3,20     | -1,02  | 265,06      | 241,31   | 23,75  | 100,46     | 89,13    | 11,33  |
| 2  | 7,51        | 8,17     | -0,66  | 157,30      | 156,65   | 0,65   | 61,16      | 76,11    | -14,95 |
| 3  | 2,33        | 1,21     | 1,12   | 331,37      | 332,43   | -1,05  | 155,63     | 146,15   | 9,48   |
| 4  | 5,47        | 5,06     | 0,41   | 227,70      | 210,92   | 16,78  | 65,86      | 65,30    | 0,56   |
| 5  | 4,13        | 7,72     | -3,59  | 208,01      | 198,21   | 9,80   | 71,70      | 51,36    | 20,34  |
| 6  | 6,43        | 10,73    | -4,30  | 119,42      | 91,79    | 27,63  | 44,07      | 32,65    | 11,42  |
| 7  | 1,89        | 4,41     | -2,52  | 419,45      | 393,52   | 25,93  | 176,26     | 140,41   | 35,85  |
| 8  | 4,13        | 6,30     | -2,17  | 253,09      | 250,25   | 2,83   | 63,43      | 53,86    | 9,57   |
| 9  | 3,78        | 5,22     | -1,44  | 218,84      | 229,88   | -11,04 | 108,49     | 102,23   | 6,26   |
| 10 | 16,00       | 10,05    | 5,95   | 200,15      | 226,70   | -26,55 | 25,04      | 60,85    | -35,82 |
| 11 | 11,90       | 7,74     | 4,16   | 96,51       | 120,46   | -23,95 | 36,48      | 43,13    | -6,65  |
| 12 | 2,68        | 2,34     | 0,34   | 316,70      | 330,34   | -13,64 | 86,01      | 108,91   | -22,90 |
| 13 | 3,78        | 1,74     | 2,04   | 325,37      | 347,30   | -21,93 | 95,77      | 131,48   | -35,71 |
| 14 | 9,97        | 7,50     | 2,46   | 139,97      | 155,64   | -15,67 | 53,91      | 47,76    | 6,15   |
| 15 | 4,18        | 4,35     | -0,17  | 248,31      | 246,06   | 2,24   | 80,83      | 91,01    | -10,18 |
| 16 | 3,75        | 4,35     | -0,60  | 250,27      | 246,06   | 4,21   | 106,26     | 91,01    | 15,25  |

## 2.2. Ultra-Turrax® homogenizer

**Table S7.** Analysis of variance (ANOVA) of the second-order polynomial model for optimization of the extraction of antioxidants from *F. spiralis*, using Ultra-Turrax® homogenizer. t: extraction time (s); R: biomass:solvent ratio (g biomass/100 mL solvent); S: solvent (% of water in water:ethanol mixture); SS: Sum of squares; d.f.: Degree of freedom; MS: Mean square; F: F value; p: probability; L: Linear effect; Q: Quadratic effect; 1Lby2L: interaction between the linear effect of t and the linear effect of R; 1Lby3L: interaction between the linear effect of t and the linear effect of S; 2Lby3L: interaction between the linear effect of R and the linear effect of S. All parameters were non-significant.

|             | <i>DPPH</i> |    |        |       |       | <i>FRAP</i> |    |           |      |       | <i>TPC</i> |    |          |      |       |
|-------------|-------------|----|--------|-------|-------|-------------|----|-----------|------|-------|------------|----|----------|------|-------|
|             | SS          | df | MS     | F     | p     | SS          | df | MS        | F    | p     | SS         | df | MS       | F    | p     |
| (1)t (L)    | 22,44       | 1  | 22,44  | 1,53  | 0,432 | 12481,50    | 1  | 12481,50  | 0,47 | 0,616 | 55,27      | 1  | 55,27    | 0,05 | 0,862 |
| t (Q)       | 1,35        | 1  | 1,35   | 0,09  | 0,812 | 105683,40   | 1  | 105683,40 | 4,01 | 0,295 | 1,05       | 1  | 1,05     | 0,00 | 0,981 |
| (2)R (L)    | 205,35      | 1  | 205,35 | 14,04 | 0,166 | 20892,90    | 1  | 20892,90  | 0,79 | 0,537 | 58,72      | 1  | 58,72    | 0,05 | 0,858 |
| R (Q)       | 14,28       | 1  | 14,28  | 0,98  | 0,504 | 16,60       | 1  | 16,60     | 0,00 | 0,984 | 175,33     | 1  | 175,33   | 0,15 | 0,763 |
| (3)S (L)    | 162,68      | 1  | 162,68 | 11,13 | 0,185 | 7503,30     | 1  | 7503,30   | 0,28 | 0,688 | 11120,16   | 1  | 11120,16 | 9,71 | 0,198 |
| S (Q)       | 93,48       | 1  | 93,48  | 6,39  | 0,240 | 30683,20    | 1  | 30683,20  | 1,17 | 0,476 | 5239,28    | 1  | 5239,28  | 4,58 | 0,278 |
| 1L by 2L    | 8,63        | 1  | 8,63   | 0,59  | 0,583 | 5966,30     | 1  | 5966,30   | 0,23 | 0,717 | 75,84      | 1  | 75,84    | 0,07 | 0,840 |
| 1L by 3L    | 32,68       | 1  | 32,68  | 2,24  | 0,375 | 34358,80    | 1  | 34358,80  | 1,30 | 0,458 | 30,41      | 1  | 30,41    | 0,03 | 0,897 |
| 2L by 3L    | 85,96       | 1  | 85,96  | 5,88  | 0,249 | 50368,90    | 1  | 50368,90  | 1,91 | 0,399 | 1786,30    | 1  | 1786,30  | 1,56 | 0,430 |
| Lack of Fit | 55,54       | 5  | 11,11  | 0,76  | 0,697 | 279255,20   | 5  | 55851,00  | 2,12 | 0,477 | 2111,52    | 5  | 422,30   | 0,37 | 0,839 |
| Pure Error  | 14,62       | 1  | 14,62  |       |       | 26336,90    | 1  | 26336,90  |      |       | 1145,16    | 1  | 1145,16  |      |       |
| Total SS    | 692,11      | 15 |        |       |       | 572310,00   | 15 |           |      |       | 22773,02   | 15 |          |      |       |
| $R^2$       |             |    | 0.899  |       |       |             |    | 0.466     |      |       |            |    | 0.857    |      |       |
| $R^2 adj.$  |             |    | 0.747  |       |       |             |    | 0.000     |      |       |            |    | 0.642    |      |       |

**Table S8.** Effect estimates of variables in the extraction with Ultra-Turrax® homogenizer. t: extraction time (s); R: biomass:solvent ratio (g biomass/100 mL solvent); S: solvent (% of water in water:ethanol mixture); L: Linear effect; Q: Quadratic effect; 1Lby2L: interaction between the linear effect of t and the linear effect of R; 1Lby3L: interaction between the linear effect of t and the linear effect of S; 2Lby3L: interaction between the linear effect of R and the linear effect of S. Significant parameters are presented in red.

|             | Parameter    | Effect  | Std.Err. - Pure Err | t(1)  | p     | -95,% - Cnf.Limt | +95,% - Cnf.Limt | Coeff. | Std.Err. - Coeff. | -95,% - Cnf.Limt | +95,% - Cnf.Limt |
|-------------|--------------|---------|---------------------|-------|-------|------------------|------------------|--------|-------------------|------------------|------------------|
| <i>DPPH</i> | Mean/Interc. | 18,68   | 2,70                | 6,93  | 0,091 | -15,57           | 52,94            | 18,68  | 2,70              | -15,57           | 52,94            |
|             | (1)t (L)     | -2,56   | 2,07                | -1,24 | 0,432 | -28,86           | 23,73            | -1,28  | 1,03              | -14,43           | 11,87            |
|             | t (Q)        | -0,76   | 2,51                | -0,30 | 0,812 | -32,69           | 31,16            | -0,38  | 1,26              | -16,34           | 15,58            |
|             | (2)R (L)     | -7,76   | 2,07                | -3,75 | 0,166 | -34,05           | 18,54            | -3,88  | 1,03              | -17,02           | 9,27             |
|             | R (Q)        | -2,48   | 2,51                | -0,99 | 0,504 | -34,41           | 29,44            | -1,24  | 1,26              | -17,20           | 14,72            |
|             | (3)S (L)     | 6,90    | 2,07                | 3,34  | 0,185 | -19,39           | 33,20            | 3,45   | 1,03              | -9,70            | 16,60            |
|             | S (Q)        | -6,35   | 2,51                | -2,53 | 0,240 | -38,28           | 25,57            | -3,18  | 1,26              | -19,14           | 12,79            |
|             | 1L by 2L     | -2,08   | 2,70                | -0,77 | 0,583 | -36,43           | 32,28            | -1,04  | 1,35              | -18,22           | 16,14            |
|             | 1L by 3L     | 4,04    | 2,70                | 1,50  | 0,375 | -30,31           | 38,40            | 2,02   | 1,35              | -15,16           | 19,20            |
|             | 2L by 3L     | -6,56   | 2,70                | -2,42 | 0,249 | -40,91           | 27,80            | -3,28  | 1,35              | -20,46           | 13,90            |
| <i>FRAP</i> | Mean/Interc. | 686,38  | 114,42              | 6,00  | 0,105 | -767,43          | 2140,19          | 686,38 | 114,42            | -767,43          | 2140,19          |
|             | (1)t (L)     | -60,46  | 87,83               | -0,69 | 0,616 | -1176,43         | 1055,51          | -30,23 | 43,91             | -588,22          | 527,75           |
|             | t (Q)        | 213,62  | 106,64              | 2,00  | 0,295 | -1141,34         | 1568,57          | 106,81 | 53,32             | -570,67          | 784,29           |
|             | (2)R (L)     | 78,23   | 87,83               | 0,89  | 0,537 | -1037,74         | 1194,20          | 39,11  | 43,91             | -518,87          | 597,10           |
|             | R (Q)        | 2,68    | 106,64              | 0,03  | 0,984 | -1352,28         | 1357,64          | 1,34   | 53,32             | -676,14          | 678,82           |
|             | (3)S (L)     | -46,88  | 87,83               | -0,53 | 0,688 | -1162,85         | 1069,09          | -23,44 | 43,91             | -581,43          | 534,55           |
|             | S (Q)        | 115,10  | 106,64              | 1,08  | 0,476 | -1239,86         | 1470,06          | 57,55  | 53,32             | -619,93          | 735,03           |
|             | 1L by 2L     | 54,62   | 114,75              | 0,48  | 0,717 | -1403,47         | 1512,70          | 27,31  | 57,38             | -701,73          | 756,35           |
|             | 1L by 3L     | -131,07 | 114,75              | -1,14 | 0,458 | -1589,16         | 1327,02          | -65,54 | 57,38             | -794,58          | 663,51           |
|             | 2L by 3L     | 158,70  | 114,75              | 1,38  | 0,399 | -1299,39         | 1616,78          | 79,35  | 57,38             | -649,69          | 808,39           |
| <i>TPC</i>  | Mean/Interc. | 124,32  | 23,86               | 5,21  | 0,121 | -178,83          | 427,47           | 124,32 | 23,86             | -178,83          | 427,47           |
|             | (1)t (L)     | 4,02    | 18,31               | 0,22  | 0,862 | -228,68          | 236,73           | 2,01   | 9,16              | -114,34          | 118,36           |
|             | t (Q)        | 0,67    | 22,24               | 0,03  | 0,981 | -281,87          | 283,21           | 0,34   | 11,12             | -140,93          | 141,61           |
|             | (2)R (L)     | 4,15    | 18,31               | 0,23  | 0,858 | -228,56          | 236,85           | 2,07   | 9,16              | -114,28          | 118,43           |
|             | R (Q)        | 8,70    | 22,24               | 0,39  | 0,763 | -273,84          | 291,24           | 4,35   | 11,12             | -136,92          | 145,62           |
|             | (3)S (L)     | -57,07  | 18,31               | -3,12 | 0,198 | -289,77          | 175,63           | -28,54 | 9,16              | -144,89          | 87,82            |
|             | S (Q)        | 47,56   | 22,24               | 2,14  | 0,278 | -234,98          | 330,10           | 23,78  | 11,12             | -117,49          | 165,05           |
|             | 1L by 2L     | 6,16    | 23,93               | 0,26  | 0,840 | -297,88          | 310,20           | 3,08   | 11,96             | -148,94          | 155,10           |
|             | 1L by 3L     | -3,90   | 23,93               | -0,16 | 0,897 | -307,94          | 300,14           | -1,95  | 11,96             | -153,97          | 150,07           |
|             | 2L by 3L     | 29,89   | 23,93               | 1,25  | 0,430 | -274,16          | 333,93           | 14,94  | 11,96             | -137,08          | 166,96           |

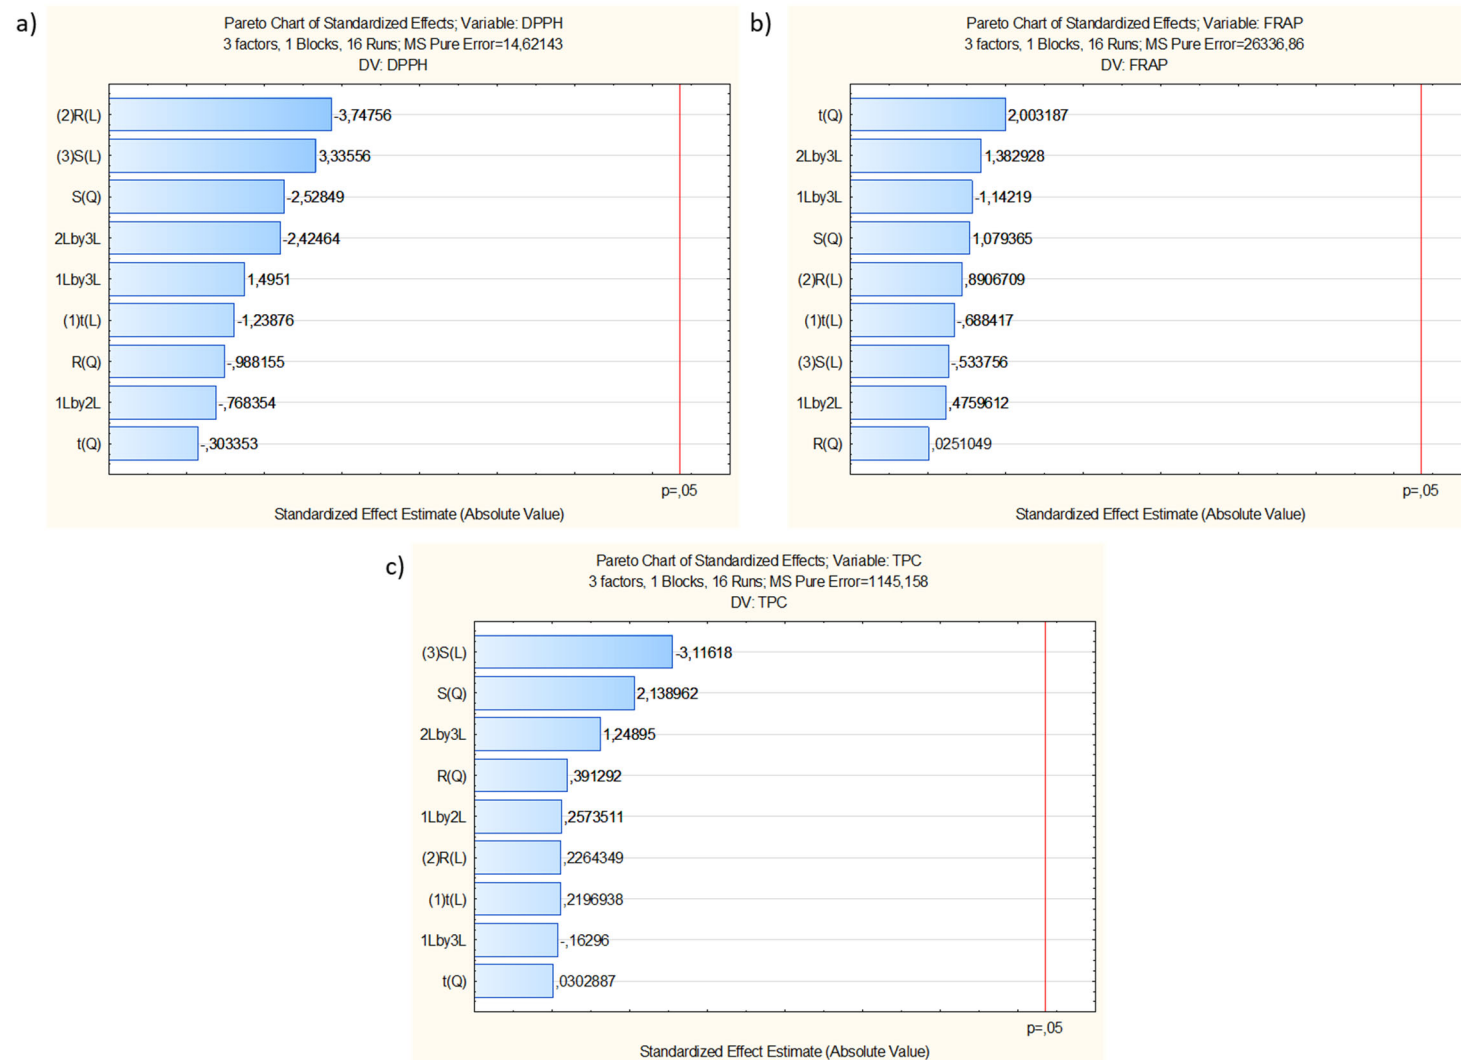

**Figure S3.** Pareto charts of the standardized effects of independent variables t, R and S in dependent variables DPPH (a), FRAP (b) and TPC (c) in the extraction of antioxidants with Ultra-Turrax® homogenizer.

**Table S9.** Regression coefficients, standard error (SE) and *p*-value of the second-order polynomial models for optimization of the extraction of antioxidants from *F. spiralis*, using Ultra-Turrax® homogenizer. t: extraction time (s); R: biomass:solvent ratio (g biomass/100 mL solvent); S: solvent (% of water in water:ethanol mixture); L: Linear effect; Q: Quadratic effect; 1Lby2L: interaction between the linear effect of t and the linear effect of R; 1Lby3L: interaction between the linear effect of t and the linear effect of S; 2Lby3L: interaction between the linear effect of R and the linear effect of S. Significant parameters are presented in red.

|          | DPPH   |       |       |       |         |        | FRAP    |        |       |       |          |         | TPC    |        |       |       |          |         |
|----------|--------|-------|-------|-------|---------|--------|---------|--------|-------|-------|----------|---------|--------|--------|-------|-------|----------|---------|
|          | Coeff. | SE    | t(1)  | p     | -95,%   | +95,%  | Coeff.  | SE     | t(1)  | p     | -95,%    | +95,%   | Coeff. | SE     | t(1)  | p     | -95,%    | +95,%   |
| Interc.  | 0,91   | 11,69 | 0,08  | 0,950 | -147,66 | 149,48 | 1454,03 | 496,25 | 2,93  | 0,209 | -4851,40 | 7759,46 | 298,10 | 103,48 | 2,88  | 0,213 | -1016,72 | 1612,92 |
| (1)t (L) | -0,02  | 0,08  | -0,20 | 0,877 | -1,00   | 0,97   | -5,09   | 3,30   | -1,54 | 0,366 | -47,04   | 36,85   | -0,02  | 0,69   | -0,03 | 0,980 | -8,77    | 8,73    |
| t (Q)    | 0,00   | 0,00  | -0,30 | 0,812 | 0,00    | 0,00   | 0,02    | 0,01   | 2,00  | 0,295 | -0,09    | 0,12    | 0,00   | 0,00   | 0,03  | 0,981 | -0,02    | 0,02    |
| (2)R (L) | 0,58   | 0,41  | 1,40  | 0,394 | -4,68   | 5,84   | -10,89  | 17,57  | -0,62 | 0,647 | -234,19  | 212,42  | -3,17  | 3,66   | -0,87 | 0,546 | -49,73   | 43,39   |
| R (Q)    | -0,01  | 0,01  | -0,99 | 0,504 | -0,08   | 0,07   | 0,01    | 0,26   | 0,03  | 0,984 | -3,32    | 3,33    | 0,02   | 0,05   | 0,39  | 0,763 | -0,67    | 0,72    |
| (3)S (L) | 0,54   | 0,19  | 2,79  | 0,219 | -1,91   | 2,98   | -7,63   | 8,17   | -0,93 | 0,522 | -111,38  | 96,12   | -4,43  | 1,70   | -2,60 | 0,234 | -26,07   | 17,20   |
| S (Q)    | 0,00   | 0,00  | -2,53 | 0,240 | -0,02   | 0,01   | 0,07    | 0,06   | 1,08  | 0,476 | -0,70    | 0,83    | 0,03   | 0,01   | 2,14  | 0,278 | -0,13    | 0,19    |
| 1L by 2L | 0,00   | 0,00  | -0,77 | 0,583 | -0,02   | 0,01   | 0,02    | 0,05   | 0,48  | 0,717 | -0,61    | 0,66    | 0,00   | 0,01   | 0,26  | 0,840 | -0,13    | 0,14    |
| 1L by 3L | 0,00   | 0,00  | 1,50  | 0,375 | -0,01   | 0,01   | -0,03   | 0,02   | -1,14 | 0,458 | -0,33    | 0,28    | 0,00   | 0,01   | -0,16 | 0,897 | -0,06    | 0,06    |
| 2L by 3L | -0,01  | 0,00  | -2,42 | 0,249 | -0,05   | 0,03   | 0,19    | 0,14   | 1,38  | 0,399 | -1,53    | 1,91    | 0,04   | 0,03   | 1,25  | 0,430 | -0,32    | 0,39    |

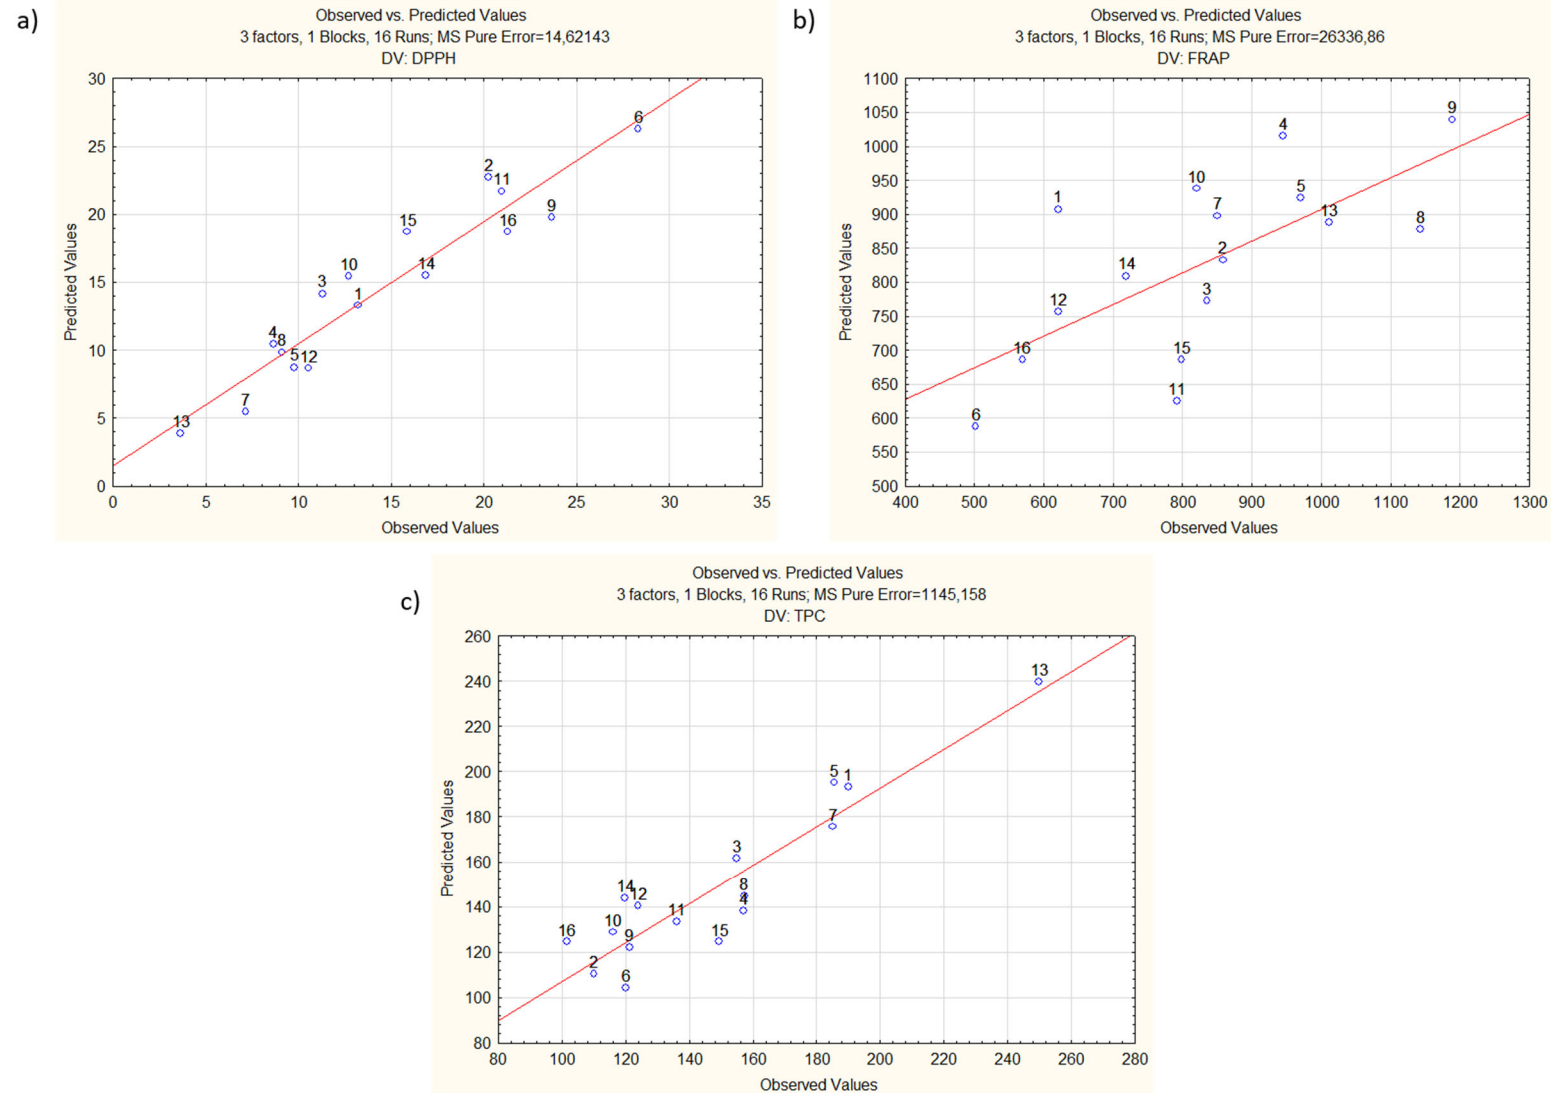

**Figure S4.** Observed vs. predicted DPPH (a), FRAP (b) and TPC (c) values for the extraction with Ultra-Turrax® homogenizer.

**Table S10.** Observed, predicted, and residual values for the extraction with Ultra-Turrax® homogenizer.

|    | <i>DPPH</i> |          |        | <i>FRAP</i> |          |         | <i>TPC</i> |          |        |
|----|-------------|----------|--------|-------------|----------|---------|------------|----------|--------|
|    | Observed    | Predictd | Resids | Observed    | Predictd | Resids  | Observed   | Predictd | Resids |
| 1  | 13,25       | 13,29    | -0,05  | 620,74      | 907,76   | -287,02 | 189,90     | 193,31   | -3,41  |
| 2  | 20,24       | 22,71    | -2,47  | 858,11      | 833,25   | 24,86   | 110,05     | 110,25   | -0,21  |
| 3  | 11,27       | 14,17    | -2,90  | 835,03      | 772,67   | 62,36   | 154,89     | 161,41   | -6,52  |
| 4  | 8,64        | 10,48    | -1,83  | 945,63      | 1015,56  | -69,92  | 157,02     | 138,13   | 18,89  |
| 5  | 9,77        | 8,77     | 1,01   | 971,09      | 923,75   | 47,35   | 185,60     | 195,07   | -9,48  |
| 6  | 28,34       | 26,27    | 2,07   | 502,16      | 587,10   | -84,94  | 120,16     | 104,22   | 15,94  |
| 7  | 7,14        | 5,49     | 1,65   | 850,46      | 897,90   | -47,44  | 185,11     | 175,49   | 9,62   |
| 8  | 9,10        | 9,88     | -0,78  | 1143,08     | 878,64   | 264,44  | 157,23     | 144,41   | 12,82  |
| 9  | 23,67       | 19,76    | 3,91   | 1188,81     | 1039,32  | 149,49  | 121,22     | 121,89   | -0,67  |
| 10 | 12,70       | 15,45    | -2,75  | 820,07      | 937,63   | -117,56 | 116,01     | 128,65   | -12,65 |
| 11 | 20,96       | 21,69    | -0,73  | 791,74      | 624,39   | 167,35  | 135,98     | 133,14   | 2,84   |
| 12 | 10,55       | 8,65     | 1,90   | 620,53      | 755,95   | -135,42 | 123,95     | 140,11   | -16,16 |
| 13 | 3,67        | 3,89     | -0,23  | 1011,33     | 888,58   | 122,75  | 249,93     | 239,57   | 10,36  |
| 14 | 16,89       | 15,50    | 1,39   | 718,92      | 809,74   | -90,82  | 119,92     | 143,59   | -23,67 |
| 15 | 15,88       | 18,68    | -2,80  | 798,40      | 686,38   | 112,01  | 149,39     | 124,32   | 25,07  |
| 16 | 21,28       | 18,68    | 2,60   | 568,89      | 686,38   | -117,49 | 101,53     | 124,32   | -22,79 |

### 2.3. Ultrasonic bath

**Table S11.** Analysis of variance (ANOVA) of the second-order polynomial model for optimization of the extraction of antioxidants from *F. spiralis*, using ultrasonic bath-assisted extraction. t: extraction time (s); R: biomass:solvent ratio (g biomass/100 mL solvent); S: solvent (% of water in water:ethanol mixture); SS: Sum of squares; df.: Degree of freedom; MS: Mean square; F: F value; p: probability; L: Linear effect; Q: Quadratic effect; 1Lby2L: interaction between the linear effect of t and the linear effect of R; 1Lby3L: interaction between the linear effect of t and the linear effect of S; 2Lby3L: interaction between the linear effect of R and the linear effect of S. Significant parameters are presented in red.

|             | <i>DPPH</i> |    |         |        |       | <i>FRAP</i> |    |          |          |       | <i>TPC</i> |    |          |            |       |
|-------------|-------------|----|---------|--------|-------|-------------|----|----------|----------|-------|------------|----|----------|------------|-------|
|             | SS          | df | MS      | F      | p     | SS          | df | MS       | F        | p     | SS         | df | MS       | F          | p     |
| (1)t (L)    | 245,43      | 1  | 245,43  | 31,59  | 0,112 | 12,20       | 1  | 12,21    | 6,31     | 0,241 | 1916,50    | 1  | 1916,54  | 232487,00  | 0,001 |
| t (Q)       | 159,25      | 1  | 159,25  | 20,50  | 0,138 | 253,50      | 1  | 253,51   | 130,90   | 0,056 | 12926,20   | 1  | 12926,18 | 1568021,00 | 0,001 |
| (2)R (L)    | 574,16      | 1  | 574,16  | 73,90  | 0,074 | 53357,80    | 1  | 53357,78 | 27550,51 | 0,004 | 20978,90   | 1  | 20978,91 | 2544865,00 | 0,000 |
| R (Q)       | 57,30       | 1  | 57,30   | 7,37   | 0,225 | 362,50      | 1  | 362,48   | 187,16   | 0,046 | 10,30      | 1  | 10,34    | 1254,00    | 0,018 |
| (3)S (L)    | 4079,67     | 1  | 4079,67 | 525,08 | 0,028 | 39681,90    | 1  | 39681,93 | 20489,18 | 0,004 | 12879,00   | 1  | 12879,04 | 1562303,00 | 0,001 |
| S (Q)       | 1305,39     | 1  | 1305,39 | 168,01 | 0,049 | 23,30       | 1  | 23,32    | 12,04    | 0,179 | 1576,90    | 1  | 1576,93  | 191291,00  | 0,001 |
| 1L by 2L    | 3,66        | 1  | 3,66    | 0,47   | 0,617 | 5447,70     | 1  | 5447,73  | 2812,86  | 0,012 | 133,90     | 1  | 133,90   | 16243,00   | 0,005 |
| 1L by 3L    | 28,98       | 1  | 28,98   | 3,73   | 0,304 | 237,60      | 1  | 237,63   | 122,70   | 0,057 | 8333,50    | 1  | 8333,54  | 1010908,00 | 0,001 |
| 2L by 3L    | 1083,20     | 1  | 1083,20 | 139,41 | 0,054 | 681,10      | 1  | 681,12   | 351,69   | 0,034 | 6124,70    | 1  | 6124,73  | 742966,00  | 0,001 |
| Lack of Fit | 2803,10     | 5  | 560,62  | 72,15  | 0,089 | 6133,30     | 5  | 1226,66  | 633,37   | 0,030 | 46009,50   | 5  | 9201,90  | 1116245,00 | 0,001 |
| Pure Error  | 7,77        | 1  | 7,77    |        |       | 1,90        | 1  | 1,94     |          |       | 0,00       | 1  | 0,01     |            |       |
| Total SS    | 10785,11    | 15 |         |        |       | 106032,80   | 15 |          |          |       | 119089,70  | 15 |          |            |       |
| $R^2$       |             |    | 0.739   |        |       |             |    | 0.942    |          |       |            |    | 0.614    |            |       |
| $R^2$ adj.  |             |    | 0.348   |        |       |             |    | 0.855    |          |       |            |    | 0.034    |            |       |



**Table S12.** Effect estimates of variables in ultrasonic bath-assisted extraction. t: extraction time (s); R: biomass:solvent ratio (g biomass/100 mL solvent); S: solvent (% of water in water:ethanol mixture); L: Linear effect; Q: Quadratic effect; 1Lby2L: interaction between the linear effect of t and the linear effect of R; 1Lby3L: interaction between the linear effect of t and the linear effect of S; 2Lby3L: interaction between the linear effect of R and the linear effect of S. Significant parameters are presented in red.

|      | Parameters   | Effect  | Std.Err. - Pure Err | t(1)     | p      | -95,% - Cnf.Limt | +95,% - Cnf.Limt | Coeff. | Std.Err. - Coeff. | -95,% - Cnf.Limt | +95,% - Cnf.Limt |
|------|--------------|---------|---------------------|----------|--------|------------------|------------------|--------|-------------------|------------------|------------------|
| DPPH | Mean/Interc. | 9,79    | 1,97                | 4,98     | 0,126  | -15,18           | 34,76            | 9,79   | 1,97              | -15,18           | 34,76            |
|      | (1)t (L)     | -8,48   | 1,51                | -5,62    | 0,112  | -27,65           | 10,69            | -4,24  | 0,75              | -13,82           | 5,34             |
|      | t (Q)        | 8,29    | 1,83                | 4,53     | 0,138  | -14,98           | 31,56            | 4,15   | 0,92              | -7,49            | 15,78            |
|      | (2)R (L)     | -12,97  | 1,51                | -8,60    | 0,074  | -32,14           | 6,20             | -6,48  | 0,75              | -16,07           | 3,10             |
|      | R (Q)        | -4,97   | 1,83                | -2,72    | 0,225  | -28,25           | 18,30            | -2,49  | 0,92              | -14,12           | 9,15             |
|      | (3)S (L)     | 34,57   | 1,51                | 22,91    | 0,028  | 15,40            | 53,74            | 17,28  | 0,75              | 7,70             | 26,87            |
|      | S (Q)        | 23,74   | 1,83                | 12,96    | 0,049  | 0,47             | 47,01            | 11,87  | 0,92              | 0,23             | 23,51            |
|      | 1L by 2L     | 1,35    | 1,97                | 0,69     | 0,617  | -23,69           | 26,40            | 0,68   | 0,99              | -11,85           | 13,20            |
|      | 1L by 3L     | -3,81   | 1,97                | -1,93    | 0,304  | -28,85           | 21,24            | -1,90  | 0,99              | -14,43           | 10,62            |
|      | 2L by 3L     | -23,27  | 1,97                | -11,81   | 0,054  | -48,32           | 1,77             | -11,64 | 0,99              | -24,16           | 0,89             |
| FRAP | Mean/Interc. | 245,63  | 0,98                | 250,34   | 0,003  | 233,16           | 258,09           | 245,63 | 0,98              | 233,16           | 258,09           |
|      | (1)t (L)     | -1,89   | 0,75                | -2,51    | 0,241  | -11,46           | 7,68             | -0,95  | 0,38              | -5,73            | 3,84             |
|      | t (Q)        | -10,46  | 0,91                | -11,44   | 0,056  | -22,08           | 1,16             | -5,23  | 0,46              | -11,04           | 0,58             |
|      | (2)R (L)     | 125,01  | 0,75                | 165,98   | 0,004  | 115,44           | 134,58           | 62,51  | 0,38              | 57,72            | 67,29            |
|      | R (Q)        | -12,51  | 0,91                | -13,68   | 0,046  | -24,13           | -0,89            | -6,26  | 0,46              | -12,06           | -0,45            |
|      | (3)S (L)     | -107,81 | 0,75                | -143,14  | 0,004  | -117,38          | -98,24           | -53,90 | 0,38              | -58,69           | -49,12           |
|      | S (Q)        | -3,17   | 0,91                | -3,47    | 0,179  | -14,79           | 8,45             | -1,59  | 0,46              | -7,40            | 4,22             |
|      | 1L by 2L     | 52,19   | 0,98                | 53,04    | 0,012  | 39,69            | 64,69            | 26,10  | 0,49              | 19,84            | 32,35            |
|      | 1L by 3L     | -10,90  | 0,98                | -11,08   | 0,057  | -23,40           | 1,60             | -5,45  | 0,49              | -11,70           | 0,80             |
|      | 2L by 3L     | -18,45  | 0,98                | -18,75   | 0,034  | -30,96           | -5,95            | -9,23  | 0,49              | -15,48           | -2,98            |
| TPC  | Mean/Interc. | 167,38  | 0,06                | 2614,81  | <0,001 | 166,57           | 168,20           | 167,38 | 0,06              | 166,57           | 168,20           |
|      | (1)t (L)     | 23,69   | 0,05                | 482,17   | 0,001  | 23,07            | 24,32            | 11,85  | 0,02              | 11,53            | 12,16            |
|      | t (Q)        | 74,71   | 0,06                | 1252,21  | 0,001  | 73,95            | 75,47            | 37,35  | 0,03              | 36,97            | 37,73            |
|      | (2)R (L)     | 78,39   | 0,05                | 1595,26  | <0,001 | 77,76            | 79,01            | 39,19  | 0,02              | 38,88            | 39,51            |
|      | R (Q)        | 2,11    | 0,06                | 35,41    | 0,018  | 1,35             | 2,87             | 1,06   | 0,03              | 0,68             | 1,44             |
|      | (3)S (L)     | -61,42  | 0,05                | -1249,92 | 0,001  | -62,04           | -60,79           | -30,71 | 0,02              | -31,02           | -30,40           |
|      | S (Q)        | -26,09  | 0,06                | -437,37  | 0,001  | -26,85           | -25,34           | -13,05 | 0,03              | -13,43           | -12,67           |
|      | 1L by 2L     | -8,18   | 0,06                | -127,45  | 0,005  | -9,00            | -7,37            | -4,09  | 0,03              | -4,50            | -3,68            |
|      | 1L by 3L     | 64,55   | 0,06                | 1005,44  | 0,001  | 63,73            | 65,37            | 32,28  | 0,03              | 31,87            | 32,68            |
|      | 2L by 3L     | 55,34   | 0,06                | 861,95   | 0,001  | 54,52            | 56,15            | 27,67  | 0,03              | 27,26            | 28,08            |

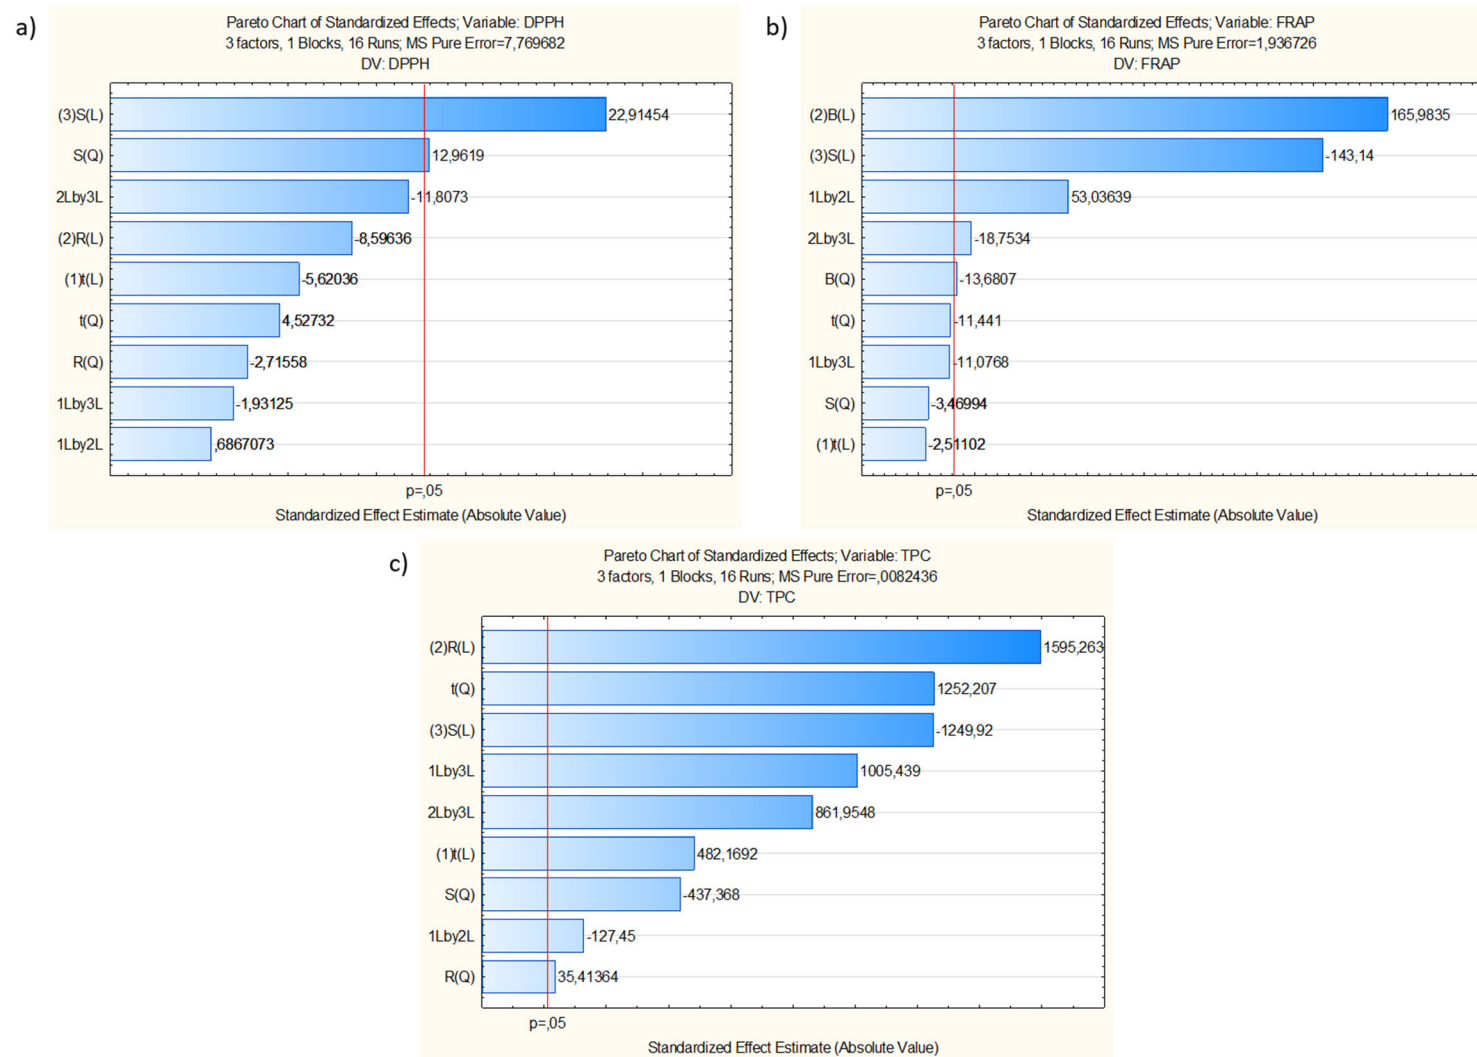

**Figure S5.** Pareto charts of the standardized effects of independent variables t, R and S in dependent variables DPPH (a), FRAP (b) and TPC (c) in the ultrasonic bath-assisted extraction.

**Table S13.** Regression coefficients, standard error (SE) and *p*-value of the second-order polynomial models for optimization of the extraction of antioxidants from *F. spiralis*, using ultrasonic bath-assisted extraction. t: extraction time (s); R: biomass:solvent ratio (g biomass/100 mL solvent); S: solvent (% of water in water:ethanol mixture); L: Linear effect; Q: Quadratic effect; 1Lby2L: interaction between the linear effect of t and the linear effect of R; 1Lby3L: interaction between the linear effect of t and the linear effect of S; 2Lby3L: interaction between the linear effect of R and the linear effect of S. Significant parameters are presented in red.

|          | <i>DPPH</i> |      |        |       |         |        | <i>FRAP</i> |      |        |       |        |        | <i>TPC</i> |      |          |        |        |        |
|----------|-------------|------|--------|-------|---------|--------|-------------|------|--------|-------|--------|--------|------------|------|----------|--------|--------|--------|
|          | Coeff.      | SE   | t(1)   | p     | -95,%   | +95,%  | Coeff.      | SE   | t(1)   | p     | -95,%  | +95,%  | Coeff.     | SE   | t(1)     | p      | -95,%  | +95,%  |
| Interc.  | 4,39        | 8,52 | 0,51   | 0,697 | -103,91 | 112,69 | 227,60      | 4,26 | 53,48  | 0,012 | 173,53 | 281,67 | 428,73     | 0,28 | 1544,23  | <0,001 | 425,21 | 432,26 |
| (1)t (L) | -0,24       | 0,06 | -4,24  | 0,147 | -0,96   | 0,48   | -0,22       | 0,03 | -7,84  | 0,081 | -0,58  | 0,14   | -2,35      | 0,00 | -1271,80 | 0,001  | -2,37  | -2,33  |
| t (Q)    | 0,00        | 0,00 | 4,53   | 0,138 | 0,00    | 0,00   | 0,00        | 0,00 | -11,44 | 0,056 | 0,00   | 0,00   | 0,01       | 0,00 | 1252,21  | 0,001  | 0,01   | 0,01   |
| (2)R (L) | 1,45        | 0,30 | 4,82   | 0,130 | -2,38   | 5,29   | 3,31        | 0,15 | 21,94  | 0,029 | 1,39   | 5,22   | -0,19      | 0,01 | -19,81   | 0,032  | -0,32  | -0,07  |
| R (Q)    | -0,01       | 0,00 | -2,72  | 0,225 | -0,07   | 0,04   | -0,03       | 0,00 | -13,68 | 0,046 | -0,06  | 0,00   | 0,01       | 0,00 | 35,41    | 0,018  | 0,00   | 0,01   |
| (3)S (L) | 0,08        | 0,14 | 0,59   | 0,660 | -1,70   | 1,87   | -0,69       | 0,07 | -9,87  | 0,064 | -1,58  | 0,20   | -3,48      | 0,00 | -762,66  | 0,001  | -3,54  | -3,43  |
| S (Q)    | 0,01        | 0,00 | 12,96  | 0,049 | 0,00    | 0,03   | 0,00        | 0,00 | -3,47  | 0,179 | -0,01  | 0,00   | -0,01      | 0,00 | -437,37  | 0,001  | -0,02  | -0,01  |
| 1L by 2L | 0,00        | 0,00 | 0,69   | 0,617 | -0,01   | 0,01   | 0,02        | 0,00 | 53,04  | 0,012 | 0,02   | 0,03   | 0,00       | 0,00 | -127,45  | 0,005  | 0,00   | 0,00   |
| 1L by 3L | 0,00        | 0,00 | -1,93  | 0,304 | -0,01   | 0,00   | 0,00        | 0,00 | -11,08 | 0,057 | 0,00   | 0,00   | 0,01       | 0,00 | 1005,44  | 0,001  | 0,01   | 0,01   |
| 2L by 3L | -0,03       | 0,00 | -11,81 | 0,054 | -0,06   | 0,00   | -0,02       | 0,00 | -18,75 | 0,034 | -0,04  | -0,01  | 0,07       | 0,00 | 861,95   | 0,001  | 0,06   | 0,07   |

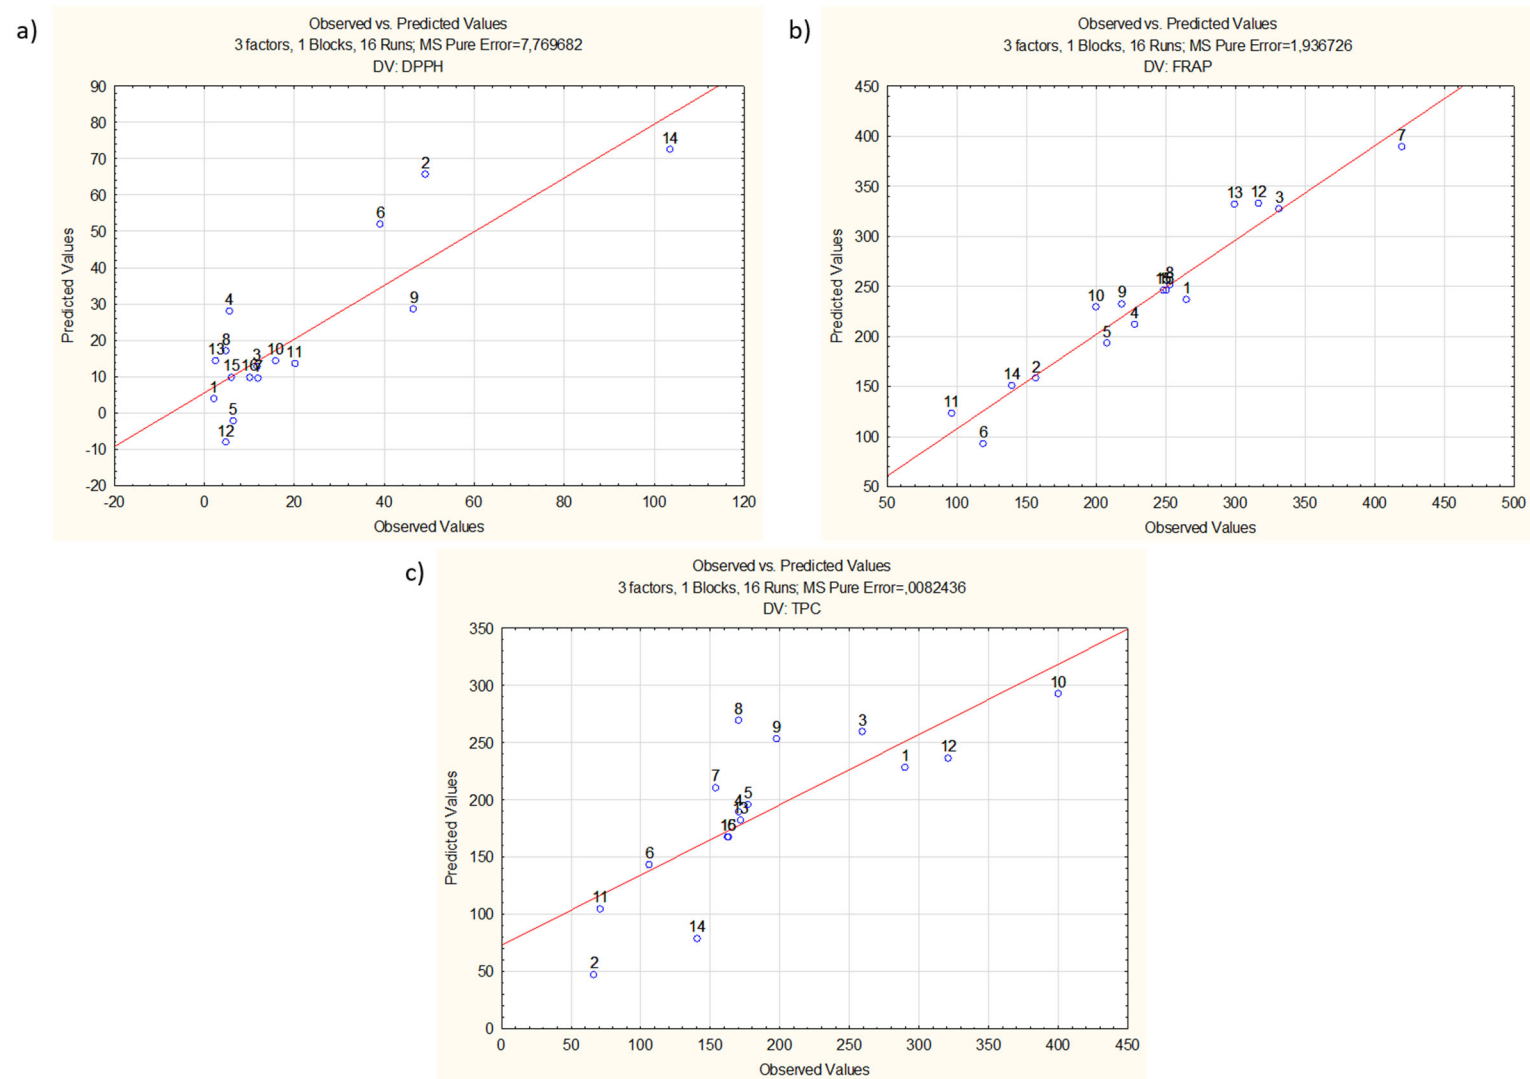

**Figure S6.** Observed vs. predicted DPPH (a), FRAP (b), and TPC (c) values for the ultrasonic bath-assisted extraction.

**Table S14.** Observed, predicted, and residual values for the ultrasonic bath-assisted extraction.

|    | <i>DPPH</i> |          |        | <i>FRAP</i> |          |        | <i>TPC</i> |          |        |
|----|-------------|----------|--------|-------------|----------|--------|------------|----------|--------|
|    | Observed    | Predictd | Resids | Observed    | Predictd | Resids | Observed   | Predictd | Resids |
| 1  | 2,25        | 3,90     | -1,65  | 265,10      | 236,31   | 28,78  | 290,25     | 228,27   | 61,98  |
| 2  | 49,25       | 65,54    | -16,29 | 157,15      | 157,86   | -0,71  | 66,72      | 46,96    | 19,76  |
| 3  | 11,81       | 12,85    | -1,04  | 331,53      | 327,59   | 3,94   | 259,84     | 259,50   | 0,34   |
| 4  | 5,59        | 27,95    | -22,36 | 227,67      | 212,23   | 15,44  | 170,66     | 188,87   | -18,21 |
| 5  | 6,47        | -2,13    | 8,60   | 207,95      | 193,13   | 14,82  | 177,32     | 195,59   | -18,28 |
| 6  | 39,19       | 51,91    | -12,72 | 119,20      | 92,88    | 26,32  | 106,57     | 143,39   | -36,82 |
| 7  | 12,06       | 9,53     | 2,53   | 419,76      | 388,79   | 30,97  | 154,22     | 210,46   | -56,24 |
| 8  | 4,91        | 17,02    | -12,11 | 253,10      | 251,63   | 1,48   | 170,47     | 268,93   | -98,46 |
| 9  | 46,60       | 28,65    | 17,95  | 218,79      | 232,42   | -13,63 | 197,55     | 253,11   | -55,56 |
| 10 | 15,90       | 14,39    | 1,51   | 200,08      | 229,24   | -29,16 | 400,12     | 292,96   | 107,16 |
| 11 | 20,15       | 13,66    | 6,48   | 96,25       | 122,81   | -26,56 | 71,03      | 104,45   | -33,43 |
| 12 | 4,83        | -8,15    | 12,98  | 316,83      | 333,06   | -16,23 | 321,31     | 236,29   | 85,02  |
| 13 | 2,65        | 14,30    | -11,65 | 299,70      | 331,79   | -32,09 | 171,79     | 182,13   | -10,33 |
| 14 | 103,55      | 72,43    | 31,12  | 139,79      | 150,48   | -10,70 | 140,76     | 78,83    | 61,93  |
| 15 | 6,15        | 9,79     | -3,64  | 248,31      | 245,63   | 2,69   | 162,89     | 167,38   | -4,49  |
| 16 | 10,09       | 9,79     | 0,30   | 250,28      | 245,63   | 4,66   | 163,02     | 167,38   | -4,36  |

## 2.4. Ultrasonic probe

**Table S15.** Analysis of variance (ANOVA) of the second-order polynomial model for optimization of the extraction of antioxidants from *F. spiralis*, using ultrasonic probe-assisted extraction. t: extraction time (s); R: biomass:solvent ratio (g biomass/100 mL solvent); S: solvent (% of water in water:ethanol mixture); SS: Sum of squares; d.f.: Degree of freedom; MS: Mean square; F: F value; p: probability; L: Linear effect; Q: Quadratic effect. All parameters were non-significant.

|             | DPPH   |    |        |       |       | FRAP      |    |          |      |       | TPC       |    |          |      |       |
|-------------|--------|----|--------|-------|-------|-----------|----|----------|------|-------|-----------|----|----------|------|-------|
|             | SS     | df | MS     | F     | p     | SS        | df | MS       | F    | p     | SS        | df | MS       | F    | p     |
| (1)t (L)    | 1,46   | 1  | 1,46   | 0,27  | 0,694 | 6261,80   | 1  | 6261,75  | 0,40 | 0,642 | 2498,90   | 1  | 2498,94  | 0,06 | 0,850 |
| t (Q)       | 2,60   | 1  | 2,60   | 0,48  | 0,613 | 4802,70   | 1  | 4802,70  | 0,31 | 0,679 | 10399,40  | 1  | 10399,40 | 0,24 | 0,710 |
| (2)R (L)    | 110,70 | 1  | 110,70 | 20,64 | 0,138 | 11435,30  | 1  | 11435,28 | 0,73 | 0,550 | 36255,70  | 1  | 36255,74 | 0,83 | 0,529 |
| R (Q)       | 123,48 | 1  | 123,48 | 23,03 | 0,131 | 13742,10  | 1  | 13742,13 | 0,87 | 0,521 | 9,60      | 1  | 9,59     | 0,00 | 0,991 |
| (3)S (L)    | 334,15 | 1  | 334,15 | 62,31 | 0,080 | 96955,50  | 1  | 96955,52 | 6,17 | 0,244 | 25487,60  | 1  | 25487,60 | 0,59 | 0,584 |
| S (Q)       | 2,86   | 1  | 2,86   | 0,53  | 0,599 | 34,80     | 1  | 34,83    | 0,00 | 0,970 | 2352,70   | 1  | 2352,75  | 0,05 | 0,854 |
| 1L by 2L    | 30,30  | 1  | 30,30  | 5,65  | 0,254 | 4368,80   | 1  | 4368,77  | 0,28 | 0,691 | 3579,40   | 1  | 3579,40  | 0,08 | 0,822 |
| 1L by 3L    | 11,67  | 1  | 11,67  | 2,18  | 0,379 | 656,70    | 1  | 656,70   | 0,04 | 0,872 | 3015,10   | 1  | 3015,11  | 0,07 | 0,836 |
| 2L by 3L    | 133,17 | 1  | 133,17 | 24,83 | 0,126 | 6968,80   | 1  | 6968,84  | 0,44 | 0,626 | 37276,90  | 1  | 37276,89 | 0,86 | 0,524 |
| Lack of Fit | 149,53 | 5  | 29,91  | 5,58  | 0,310 | 13797,20  | 5  | 2759,44  | 0,18 | 0,937 | 36421,70  | 5  | 7284,35  | 0,17 | 0,941 |
| Pure Error  | 5,36   | 1  | 5,36   |       |       | 15719,90  | 1  | 15719,91 |      |       | 43424,00  | 1  | 43423,96 |      |       |
| Total SS    | 917,01 | 15 |        |       |       | 173636,00 | 15 |          |      |       | 200689,70 | 15 |          |      |       |
| $R^2$       |        |    | 0.831  |       |       |           |    | 0.830    |      |       |           |    | 0.602    |      |       |
| $R^2$ adj.  |        |    | 0.578  |       |       |           |    | 0.575    |      |       |           |    | 0.005    |      |       |

**Table S16.** Effect estimates of variables in ultrasonic probe-assisted extraction. t: extraction time (s); R: biomass:solvent ratio (g biomass/100 mL solvent); S: solvent (% of water in water:ethanol mixture); L: Linear effect; Q: Quadratic effect; 1Lby2L: interaction between the linear effect of t and the linear effect of R; 1Lby3L: interaction between the linear effect of t and the linear effect of S; 2Lby3L: interaction between the linear effect of R and the linear effect of S. Significant parameters are presented in red.

|             | Parameters   | Effect  | Std.Err. - Pure Err | t(1)  | p     | -95,% - Cnf.Limt | +95,% - Cnf.Limt | Coeff. | Std.Err. - Coeff. | -95,% - Cnf.Limt | +95,% - Cnf.Limt |
|-------------|--------------|---------|---------------------|-------|-------|------------------|------------------|--------|-------------------|------------------|------------------|
| <i>DPPH</i> | Mean/Interc. | 6,57    | 1,63                | 4,02  | 0,155 | -14,17           | 27,32            | 6,57   | 1,63              | -14,17           | 27,32            |
|             | (1)t (L)     | -0,65   | 1,25                | -0,52 | 0,694 | -16,58           | 15,27            | -0,33  | 0,63              | -8,29            | 7,64             |
|             | t (Q)        | 1,06    | 1,52                | 0,70  | 0,613 | -18,28           | 20,39            | 0,53   | 0,76              | -9,14            | 10,20            |
|             | (2)R (L)     | -5,69   | 1,25                | -4,54 | 0,138 | -21,62           | 10,23            | -2,85  | 0,63              | -10,81           | 5,12             |
|             | R (Q)        | 7,30    | 1,52                | 4,80  | 0,131 | -12,03           | 26,64            | 3,65   | 0,76              | -6,02            | 13,32            |
|             | (3)S (L)     | 9,89    | 1,25                | 7,89  | 0,080 | -6,03            | 25,82            | 4,95   | 0,63              | -3,02            | 12,91            |
|             | S (Q)        | 1,11    | 1,52                | 0,73  | 0,599 | -18,22           | 20,45            | 0,56   | 0,76              | -9,11            | 10,22            |
|             | 1L by 2L     | 3,89    | 1,64                | 2,38  | 0,254 | -16,91           | 24,70            | 1,95   | 0,82              | -8,46            | 12,35            |
|             | 1L by 3L     | -2,42   | 1,64                | -1,48 | 0,379 | -23,22           | 18,39            | -1,21  | 0,82              | -11,61           | 9,20             |
|             | 2L by 3L     | -8,16   | 1,64                | -4,98 | 0,126 | -28,97           | 12,65            | -4,08  | 0,82              | -14,48           | 6,32             |
| <i>FRAP</i> | Mean/Interc. | 374,88  | 88,40               | 4,24  | 0,147 | -748,31          | 1498,06          | 374,88 | 88,40             | -748,31          | 1498,06          |
|             | (1)t (L)     | 42,83   | 67,85               | 0,63  | 0,642 | -819,35          | 905,00           | 21,41  | 33,93             | -409,68          | 452,50           |
|             | t (Q)        | -45,54  | 82,39               | -0,55 | 0,679 | -1092,35         | 1001,28          | -22,77 | 41,19             | -546,18          | 500,64           |
|             | (2)R (L)     | 57,87   | 67,85               | 0,85  | 0,550 | -804,30          | 920,05           | 28,94  | 33,93             | -402,15          | 460,03           |
|             | R (Q)        | -77,03  | 82,39               | -0,93 | 0,521 | -1123,84         | 969,78           | -38,51 | 41,19             | -561,92          | 484,89           |
|             | (3)S (L)     | -168,52 | 67,85               | -2,48 | 0,244 | -1030,69         | 693,66           | -84,26 | 33,93             | -515,35          | 346,83           |
|             | S (Q)        | -3,88   | 82,39               | -0,05 | 0,970 | -1050,69         | 1042,94          | -1,94  | 41,19             | -525,35          | 521,47           |
|             | 1L by 2L     | -46,74  | 88,66               | -0,53 | 0,691 | -1173,22         | 1079,75          | -23,37 | 44,33             | -586,61          | 539,87           |
|             | 1L by 3L     | -18,12  | 88,66               | -0,20 | 0,872 | -1144,61         | 1108,37          | -9,06  | 44,33             | -572,30          | 554,18           |
|             | 2L by 3L     | -59,03  | 88,66               | -0,67 | 0,626 | -1185,52         | 1067,46          | -29,51 | 44,33             | -592,76          | 533,73           |
| <i>TPC</i>  | Mean/Interc. | 312,44  | 146,92              | 2,13  | 0,280 | -1554,33         | 2179,21          | 312,44 | 146,92            | -1554,33         | 2179,21          |
|             | (1)t (L)     | -27,05  | 112,78              | -0,24 | 0,850 | -1460,02         | 1405,91          | -13,53 | 56,39             | -730,01          | 702,96           |
|             | t (Q)        | -67,01  | 136,93              | -0,49 | 0,710 | -1806,85         | 1672,83          | -33,50 | 68,46             | -903,42          | 836,42           |
|             | (2)R (L)     | 103,05  | 112,78              | 0,91  | 0,529 | -1329,92         | 1536,01          | 51,52  | 56,39             | -664,96          | 768,01           |
|             | R (Q)        | -2,03   | 136,93              | -0,01 | 0,991 | -1741,87         | 1737,80          | -1,02  | 68,46             | -870,94          | 868,90           |
|             | (3)S (L)     | -86,40  | 112,78              | -0,77 | 0,584 | -1519,37         | 1346,56          | -43,20 | 56,39             | -759,68          | 673,28           |
|             | S (Q)        | -31,87  | 136,93              | -0,23 | 0,854 | -1771,71         | 1707,97          | -15,94 | 68,46             | -885,86          | 853,98           |
|             | 1L by 2L     | -42,31  | 147,35              | -0,29 | 0,822 | -1914,56         | 1829,95          | -21,15 | 73,67             | -957,28          | 914,98           |
|             | 1L by 3L     | 38,83   | 147,35              | 0,26  | 0,836 | -1833,43         | 1911,09          | 19,41  | 73,67             | -916,72          | 955,54           |
|             | 2L by 3L     | -136,52 | 147,35              | -0,93 | 0,524 | -2008,78         | 1735,74          | -68,26 | 73,67             | -1004,39         | 867,87           |

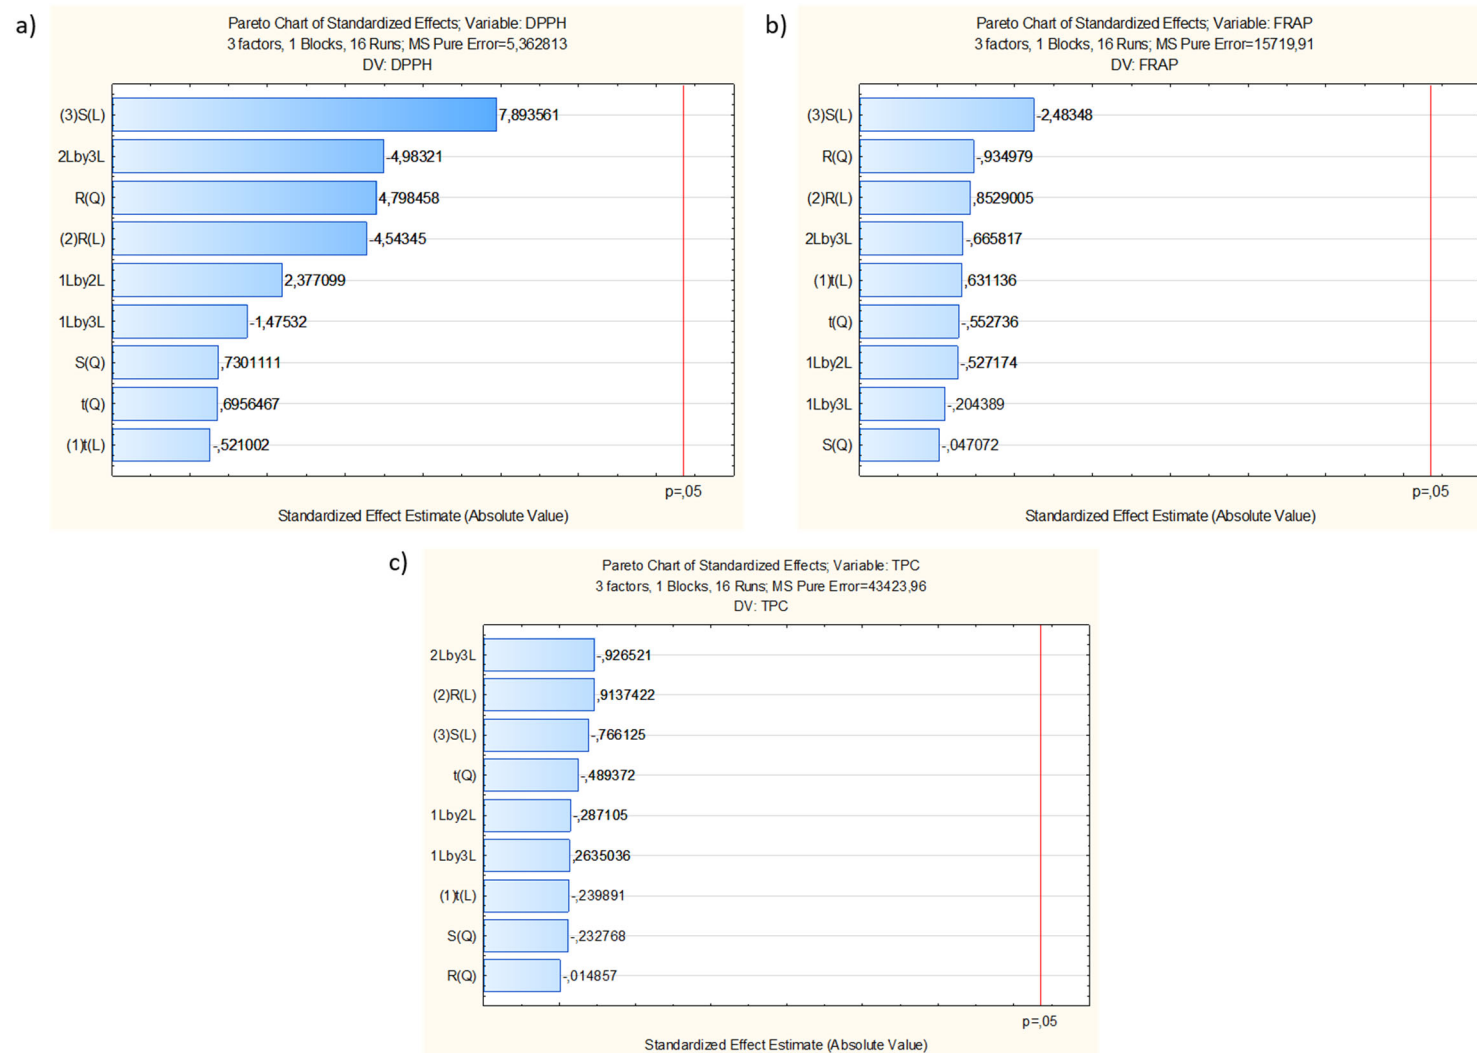

**Figure S7.** Pareto charts of the standardized effects of independent variables t, R and S in dependent variables DPPH (a), FRAP (b) and TPC (c) in the ultrasonic probe-assisted extraction.



**Table S17.** Regression coefficients, standard error (SE) and *p*-value of the second-order polynomial models for optimization of the extraction of antioxidants from *F. spiralis*, using ultrasonic probe-assisted extraction. t: extraction time (s); R: biomass:solvent ratio (g biomass/100 mL solvent); S: solvent (% of water in water:ethanol mixture); L: Linear effect; Q: Quadratic effect; 1Lby2L: interaction between the linear effect of t and the linear effect of R; 1Lby3L: interaction between the linear effect of t and the linear effect of S; 2Lby3L: interaction between the linear effect of R and the linear effect of S. Significant parameters are presented in red.

|          | <i>DPPH</i> |      |       |       |        |        | <i>FRAP</i> |        |       |       |          |         | <i>TPC</i> |        |       |       |          |         |
|----------|-------------|------|-------|-------|--------|--------|-------------|--------|-------|-------|----------|---------|------------|--------|-------|-------|----------|---------|
|          | Coeff.      | SE   | t(1)  | p     | -95,%  | +95,%  | Coeff.      | SE     | t(1)  | p     | -95,%    | +95,%   | Coeff.     | SE     | t(1)  | p     | -95,%    | +95,%   |
| Interc.  | 10,65       | 7,08 | 1,50  | 0,374 | -79,33 | 100,62 | -18,96      | 383,39 | -0,05 | 0,969 | -4890,40 | 4852,49 | -92,25     | 637,21 | -0,14 | 0,908 | -8188,75 | 8004,25 |
| (1)t (L) | -0,05       | 0,05 | -1,06 | 0,481 | -0,65  | 0,55   | 2,15        | 2,55   | 0,84  | 0,554 | -30,25   | 34,56   | 1,62       | 4,24   | 0,38  | 0,767 | -52,24   | 55,48   |
| t (Q)    | 0,00        | 0,00 | 0,70  | 0,613 | 0,00   | 0,00   | 0,00        | 0,01   | -0,55 | 0,679 | -0,08    | 0,08    | -0,01      | 0,01   | -0,49 | 0,710 | -0,14    | 0,13    |
| (2)R (L) | -0,93       | 0,25 | -3,71 | 0,167 | -4,12  | 2,26   | 18,71       | 13,58  | 1,38  | 0,400 | -153,81  | 191,23  | 14,96      | 22,57  | 0,66  | 0,627 | -271,77  | 301,69  |
| R (Q)    | 0,02        | 0,00 | 4,80  | 0,131 | -0,03  | 0,07   | -0,19       | 0,20   | -0,93 | 0,521 | -2,76    | 2,38    | -0,01      | 0,34   | -0,01 | 0,991 | -4,28    | 4,27    |
| (3)S (L) | 0,44        | 0,12 | 3,75  | 0,166 | -1,04  | 1,92   | -0,18       | 6,31   | -0,03 | 0,982 | -80,33   | 79,98   | 3,19       | 10,48  | 0,30  | 0,812 | -130,03  | 136,41  |
| S (Q)    | 0,00        | 0,00 | 0,73  | 0,599 | -0,01  | 0,01   | 0,00        | 0,05   | -0,05 | 0,970 | -0,59    | 0,59    | -0,02      | 0,08   | -0,23 | 0,854 | -1,00    | 0,97    |
| 1L by 2L | 0,00        | 0,00 | 2,38  | 0,254 | -0,01  | 0,01   | -0,02       | 0,04   | -0,53 | 0,691 | -0,51    | 0,47    | -0,02      | 0,06   | -0,29 | 0,822 | -0,84    | 0,80    |
| 1L by 3L | 0,00        | 0,00 | -1,48 | 0,379 | 0,00   | 0,00   | 0,00        | 0,02   | -0,20 | 0,872 | -0,24    | 0,23    | 0,01       | 0,03   | 0,26  | 0,836 | -0,38    | 0,40    |
| 2L by 3L | -0,01       | 0,00 | -4,98 | 0,126 | -0,03  | 0,01   | -0,07       | 0,10   | -0,67 | 0,626 | -1,40    | 1,26    | -0,16      | 0,17   | -0,93 | 0,524 | -2,37    | 2,05    |

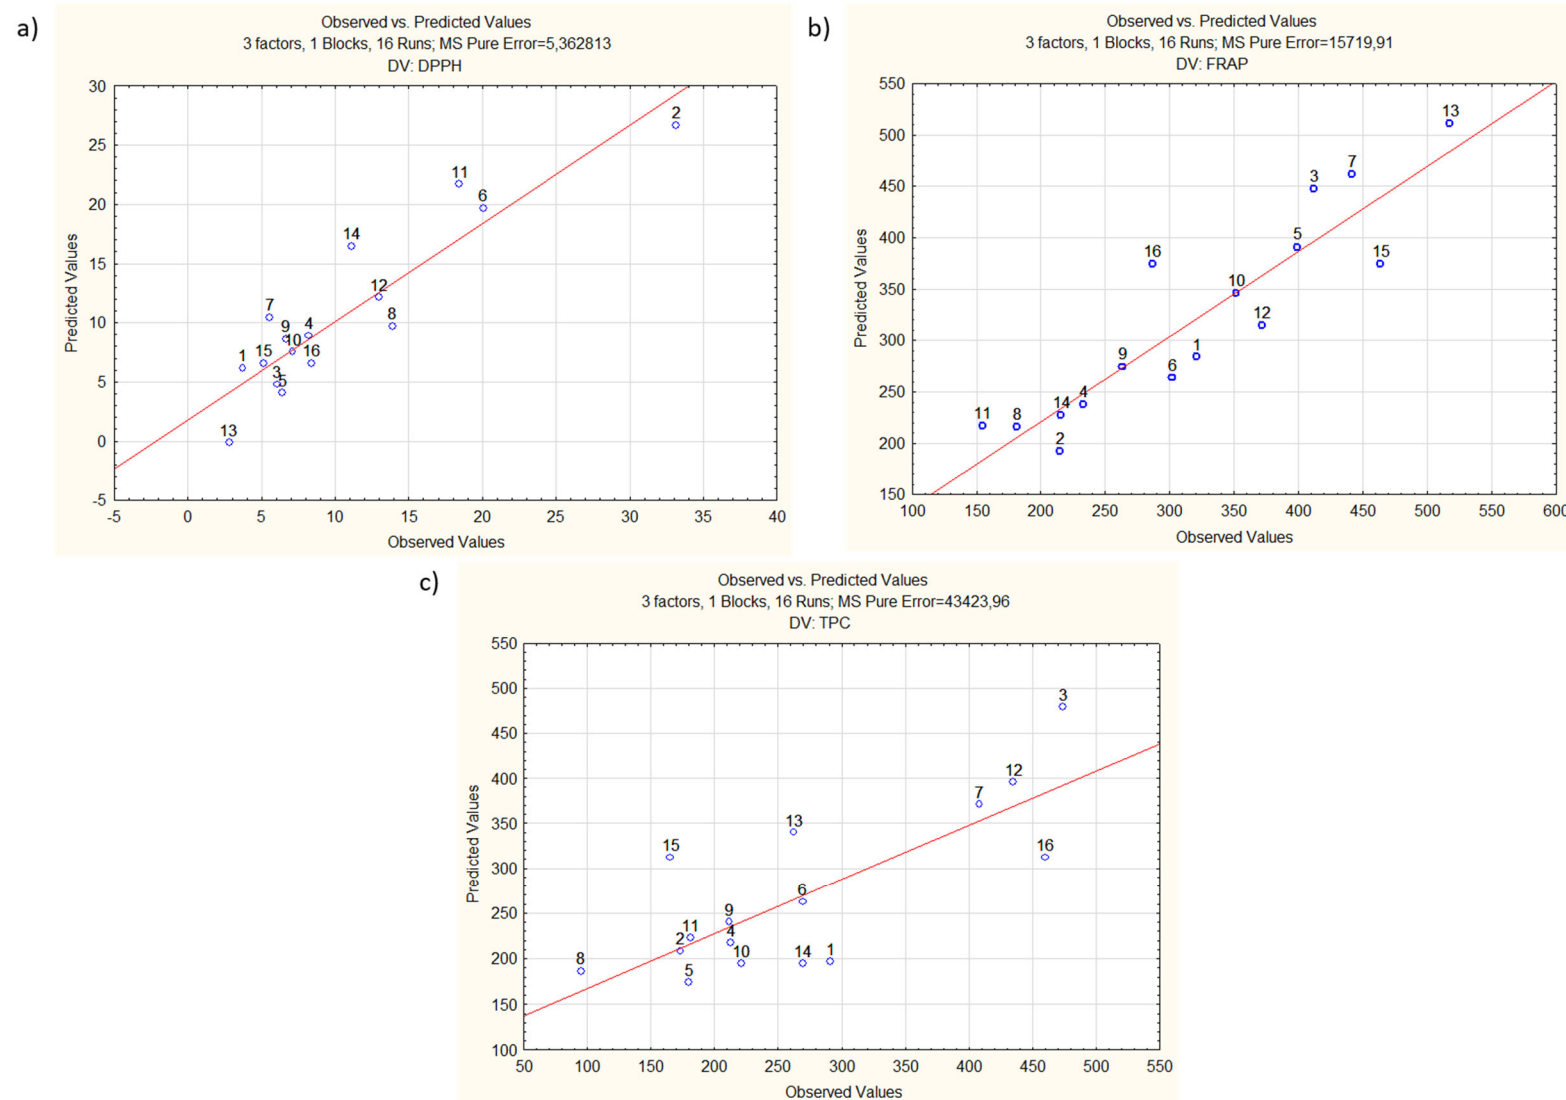

**Figure S8.** Observed vs. predicted DPPH (a), FRAP (b) and TPC (c) values for the ultrasonic probe-assisted extraction.

**Table S18.** Observed, predicted, and residual values for the ultrasonic probe-assisted extraction.

|    | <i>DPPH</i> |          |        | <i>FRAP</i> |          |        | <i>TPC</i> |          |         |
|----|-------------|----------|--------|-------------|----------|--------|------------|----------|---------|
|    | Observed    | Predictd | Resids | Observed    | Predictd | Resids | Observed   | Predictd | Resids  |
| 1  | 3,73        | 6,19     | -2,46  | 321,27      | 283,62   | 37,65  | 291,17     | 197,19   | 93,98   |
| 2  | 33,18       | 26,66    | 6,52   | 215,36      | 192,26   | 23,10  | 173,29     | 208,48   | -35,19  |
| 3  | 6,07        | 4,76     | 1,31   | 412,24      | 447,26   | -35,02 | 474,16     | 479,06   | -4,91   |
| 4  | 8,21        | 8,91     | -0,70  | 233,05      | 237,84   | -4,78  | 213,30     | 217,31   | -4,01   |
| 5  | 6,43        | 4,06     | 2,37   | 399,73      | 391,31   | 8,42   | 179,60     | 173,61   | 5,99    |
| 6  | 20,06       | 19,70    | 0,36   | 302,36      | 263,70   | 38,66  | 269,45     | 262,56   | 6,89    |
| 7  | 5,57        | 10,42    | -4,86  | 442,01      | 461,47   | -19,46 | 408,05     | 370,88   | 37,17   |
| 8  | 13,86       | 9,74     | 4,13   | 181,79      | 215,80   | -34,01 | 94,78      | 186,78   | -92,00  |
| 9  | 6,65        | 8,62     | -1,97  | 263,77      | 274,47   | -10,70 | 211,72     | 240,43   | -28,70  |
| 10 | 7,14        | 7,52     | -0,38  | 352,05      | 346,49   | 5,55   | 220,83     | 194,93   | 25,90   |
| 11 | 18,46       | 21,69    | -3,23  | 154,91      | 217,28   | -62,36 | 181,25     | 222,91   | -41,66  |
| 12 | 12,99       | 12,11    | 0,88   | 371,83      | 314,61   | 57,22  | 435,08     | 396,22   | 38,86   |
| 13 | 2,79        | -0,18    | 2,97   | 517,85      | 511,10   | 6,75   | 262,35     | 340,02   | -77,68  |
| 14 | 11,14       | 16,46    | -5,32  | 215,79      | 227,69   | -11,90 | 269,59     | 194,71   | 74,88   |
| 15 | 5,14        | 6,57     | -1,44  | 463,98      | 374,88   | 89,10  | 165,33     | 312,44   | -147,11 |
| 16 | 8,41        | 6,57     | 1,84   | 286,66      | 374,88   | -88,21 | 460,03     | 312,44   | 147,59  |

## 2.5. High pressure

**Table S19.** Analysis of variance (ANOVA) of the second-order polynomial model for optimization of the extraction of antioxidants from *F. spiralis*, using high pressure-assisted extraction. t: extraction time (s); P: pressure (MPa); S: solvent (% of water in water:ethanol mixture); SS: Sum of squares; df: Degree of freedom; MS: Mean square; F: F value; p: probability; L: Linear effect; Q: Quadratic effect; 1Lby2L: interaction between the linear effect of t and the linear effect of P; 1Lby3L: interaction between the linear effect of t and the linear effect of S; 2Lby3L: interaction between the linear effect of P and the linear effect of S. Significant parameters are presented in red.

|             | <i>DPPH</i> |    |          |         |        | <i>FRAP</i> |    |          |      |       | <i>TPC</i> |    |          |       |       |
|-------------|-------------|----|----------|---------|--------|-------------|----|----------|------|-------|------------|----|----------|-------|-------|
|             | SS          | df | MS       | F       | p      | SS          | df | MS       | F    | p     | SS         | df | MS       | F     | p     |
| (1)t (L)    | 7161,50     | 1  | 7161,54  | 606,26  | <0,001 | 6885,40     | 1  | 6885,36  | 1,70 | 0,250 | 579,39     | 1  | 579,39   | 0,20  | 0,670 |
| t (Q)       | 24121,30    | 1  | 24121,32 | 2041,98 | 0,000  | 34,70       | 1  | 34,70    | 0,01 | 0,930 | 3537,27    | 1  | 3537,27  | 1,25  | 0,314 |
| (2)P (L)    | 1935,50     | 1  | 1935,49  | 163,85  | <0,001 | 5189,30     | 1  | 5189,26  | 1,28 | 0,310 | 1,85       | 1  | 1,85     | 0,00  | 0,981 |
| P (Q)       | 5297,80     | 1  | 5297,78  | 448,48  | <0,001 | 31108,80    | 1  | 31108,85 | 7,66 | 0,039 | 32131,00   | 1  | 32131,00 | 11,36 | 0,020 |
| (3)S (L)    | 17998,10    | 1  | 17998,10 | 1523,62 | 0,000  | 5312,50     | 1  | 5312,53  | 1,31 | 0,305 | 475,57     | 1  | 475,57   | 0,17  | 0,699 |
| S (Q)       | 6827,70     | 1  | 6827,66  | 577,99  | <0,001 | 5661,10     | 1  | 5661,13  | 1,39 | 0,291 | 4,06       | 1  | 4,06     | 0,00  | 0,971 |
| 1L by 2L    | 738,10      | 1  | 738,12   | 62,49   | 0,001  | 2459,60     | 1  | 2459,56  | 0,61 | 0,472 | 323,56     | 1  | 323,56   | 0,11  | 0,749 |
| 1L by 3L    | 5839,40     | 1  | 5839,36  | 494,33  | <0,001 | 15860,60    | 1  | 15860,58 | 3,90 | 0,105 | 7187,60    | 1  | 7187,60  | 2,54  | 0,172 |
| 2L by 3L    | 2381,10     | 1  | 2381,09  | 201,57  | <0,001 | 16245,60    | 1  | 16245,59 | 4,00 | 0,102 | 8688,22    | 1  | 8688,22  | 3,07  | 0,140 |
| Lack of Fit | 62276,40    | 5  | 12455,28 | 1054,39 | 0,000  | 4800,90     | 5  | 960,17   | 0,24 | 0,930 | 9097,78    | 5  | 1819,56  | 0,64  | 0,680 |
| Pure Error  | 59,10       | 5  | 11,81    |         |        | 20310,40    | 5  | 4062,07  |      |       | 14142,91   | 5  | 2828,58  |       |       |
| Total SS    | 129790,30   | 19 |          |         |        | 111839,60   | 19 |          |      |       | 78795,30   | 19 |          |       |       |
| $R^2$       |             |    | 0,520    |         |        |             |    | 0,775    |      |       |            |    | 0,705    |       |       |
| $R^2$ adj.  |             |    | 0,087    |         |        |             |    | 0,573    |      |       |            |    | 0,440    |       |       |

**Table S20.** Effect estimates of variables in high pressure-assisted extraction. t: extraction time (s); P: pressure (MPa); S: solvent (% of water in water:ethanol mixture); L: Linear effect; Q: Quadratic effect; 1Lby2L: interaction between the linear effect of t and the linear effect of P; 1Lby3L: interaction between the linear effect of t and the linear effect of S; 2Lby3L: interaction between the linear effect of P and the linear effect of S. Significant parameters are presented in red.

|      | Parameters   | Effect | Std.Err. - Pure Err | t(1)   | p      | -95,% - Cnf.Limt | +95,% - Cnf.Limt | Coeff. | Std.Err. - Coeff. | -95,% - Cnf.Limt | +95,% - Cnf.Limt |
|------|--------------|--------|---------------------|--------|--------|------------------|------------------|--------|-------------------|------------------|------------------|
| DPPH | Mean/Interc. | 3,67   | 1,40                | 2,62   | 0,047  | 0,07             | 7,28             | 3,67   | 1,40              | 0,07             | 7,28             |
|      | (1)t (L)     | -45,82 | 1,86                | -24,62 | <0,001 | -50,60           | -41,04           | -22,91 | 0,93              | -25,30           | -20,52           |
|      | t (Q)        | 81,95  | 1,81                | 45,19  | <0,001 | 77,29            | 86,62            | 40,98  | 0,91              | 38,65            | 43,31            |
|      | (2)P (L)     | -23,82 | 1,86                | -12,80 | <0,001 | -28,60           | -19,04           | -11,91 | 0,93              | -14,30           | -9,52            |
|      | P (Q)        | 38,41  | 1,81                | 21,18  | <0,001 | 33,75            | 43,07            | 19,20  | 0,91              | 16,87            | 21,53            |
|      | (3)S (L)     | -72,64 | 1,86                | -39,03 | <0,001 | -77,42           | -67,85           | -36,32 | 0,93              | -38,71           | -33,93           |
|      | S (Q)        | 43,60  | 1,81                | 24,04  | <0,001 | 38,94            | 48,26            | 21,80  | 0,91              | 19,47            | 24,13            |
|      | 1L by 2L     | -19,21 | 2,43                | -7,90  | 0,001  | -25,46           | -12,96           | -9,61  | 1,22              | -12,73           | -6,48            |
|      | 1L by 3L     | 54,03  | 2,43                | 22,23  | <0,001 | 47,79            | 60,28            | 27,02  | 1,22              | 23,89            | 30,14            |
|      | 2L by 3L     | -34,50 | 2,43                | -14,20 | <0,001 | -40,75           | -28,26           | -17,25 | 1,22              | -20,38           | -14,13           |
| FRAP | Mean/Interc. | 225,71 | 25,99               | 8,68   | 0,000  | 158,90           | 292,53           | 225,71 | 25,99             | 158,90           | 292,53           |
|      | (1)t (L)     | -44,93 | 34,51               | -1,30  | 0,250  | -133,63          | 43,78            | -22,46 | 17,25             | -66,82           | 21,89            |
|      | t (Q)        | 3,11   | 33,63               | 0,09   | 0,930  | -83,34           | 89,56            | 1,55   | 16,82             | -41,67           | 44,78            |
|      | (2)P (L)     | -39,00 | 34,51               | -1,13  | 0,310  | -127,71          | 49,70            | -19,50 | 17,25             | -63,85           | 24,85            |
|      | P (Q)        | 93,07  | 33,63               | 2,77   | 0,039  | 6,62             | 179,52           | 46,54  | 16,82             | 3,31             | 89,76            |
|      | (3)S (L)     | 39,46  | 34,51               | 1,14   | 0,305  | -49,24           | 128,17           | 19,73  | 17,25             | -24,62           | 64,08            |
|      | S (Q)        | 39,70  | 33,63               | 1,18   | 0,291  | -46,75           | 126,16           | 19,85  | 16,82             | -23,37           | 63,08            |
|      | 1L by 2L     | 35,07  | 45,07               | 0,78   | 0,472  | -80,78           | 150,92           | 17,53  | 22,53             | -40,39           | 75,46            |
|      | 1L by 3L     | -89,05 | 45,07               | -1,98  | 0,105  | -204,90          | 26,80            | -44,53 | 22,53             | -102,45          | 13,40            |
|      | 2L by 3L     | 90,13  | 45,07               | 2,00   | 0,102  | -25,72           | 205,97           | 45,06  | 22,53             | -12,86           | 102,99           |
| TPC  | Mean/Interc. | 156,77 | 21,69               | 7,23   | 0,001  | 101,01           | 212,52           | 156,77 | 21,69             | 101,01           | 212,52           |
|      | (1)t (L)     | -13,03 | 28,80               | -0,45  | 0,670  | -87,05           | 60,99            | -6,52  | 14,40             | -43,53           | 30,49            |
|      | t (Q)        | -31,38 | 28,06               | -1,12  | 0,314  | -103,53          | 40,76            | -15,69 | 14,03             | -51,76           | 20,38            |
|      | (2)P (L)     | -0,74  | 28,80               | -0,03  | 0,981  | -74,76           | 73,29            | -0,37  | 14,40             | -37,38           | 36,64            |
|      | P (Q)        | 94,59  | 28,06               | 3,37   | 0,020  | 22,45            | 166,73           | 47,29  | 14,03             | 11,22            | 83,36            |
|      | (3)S (L)     | 11,81  | 28,80               | 0,41   | 0,699  | -62,21           | 85,83            | 5,90   | 14,40             | -31,11           | 42,91            |
|      | S (Q)        | -1,06  | 28,06               | -0,04  | 0,971  | -73,20           | 71,08            | -0,53  | 14,03             | -36,60           | 35,54            |
|      | 1L by 2L     | 12,72  | 37,61               | 0,34   | 0,749  | -83,95           | 109,39           | 6,36   | 18,80             | -41,98           | 54,70            |
|      | 1L by 3L     | -59,95 | 37,61               | -1,59  | 0,172  | -156,62          | 36,72            | -29,97 | 18,80             | -78,31           | 18,36            |
|      | 2L by 3L     | 65,91  | 37,61               | 1,75   | 0,140  | -30,76           | 162,58           | 32,95  | 18,80             | -15,38           | 81,29            |

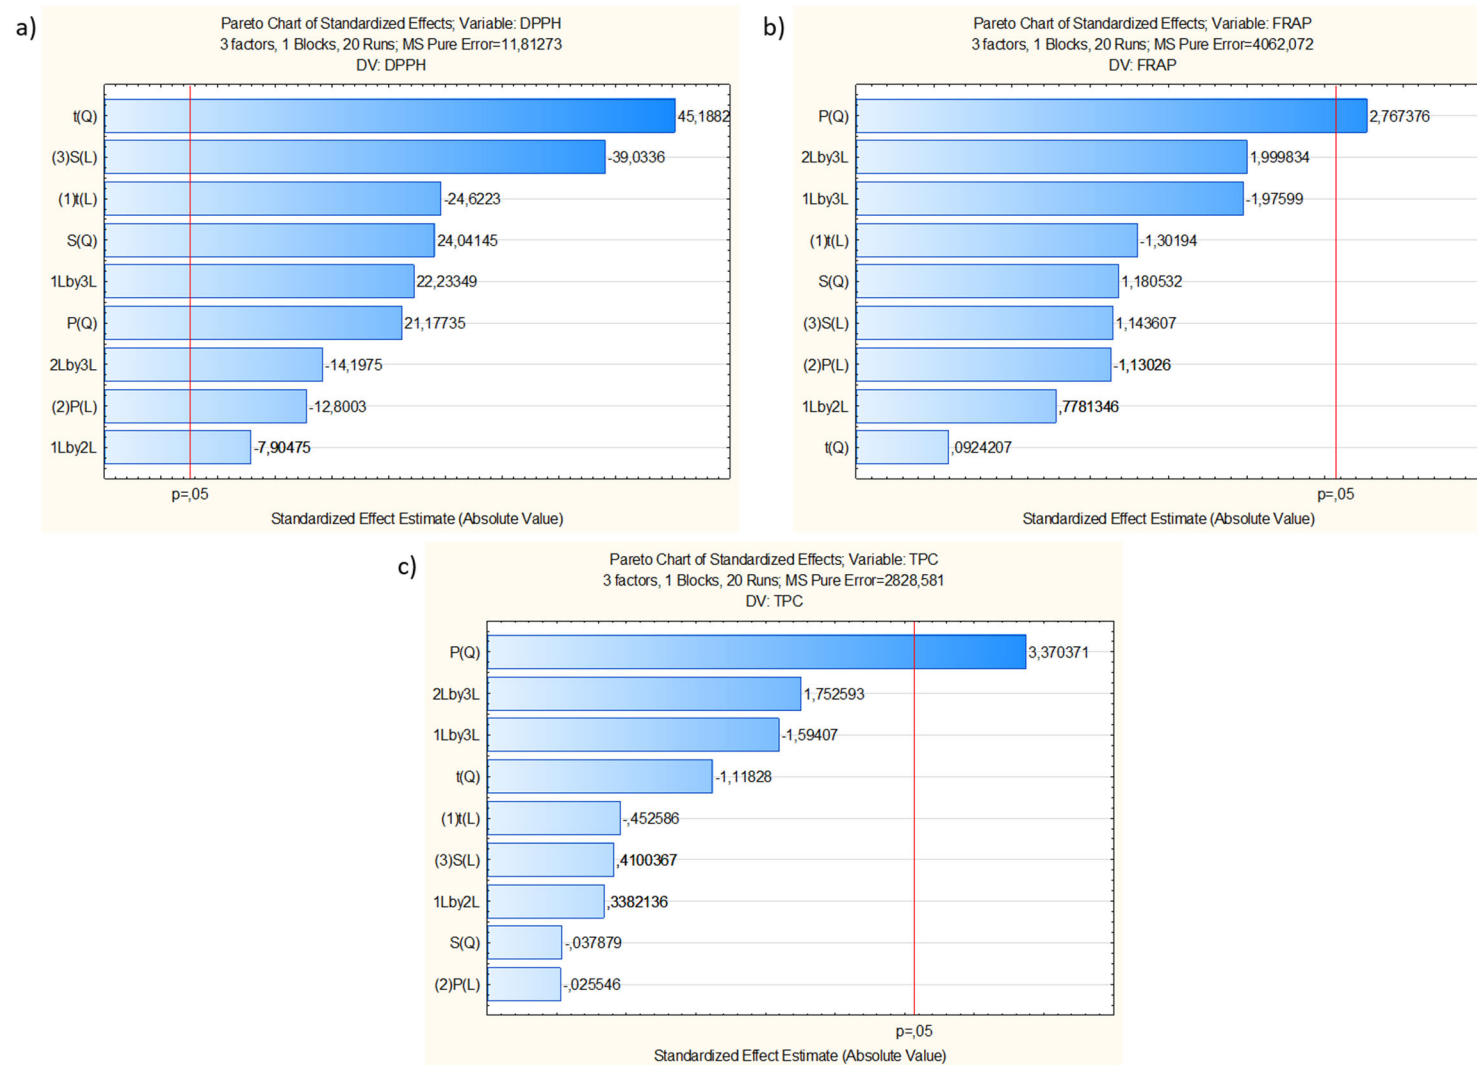

**Figure S9.** Pareto charts of the standardized effects of independent variables t, R and S in dependent variables DPPH (a), FRAP (b) and TPC (c) in the high pressure-assisted extraction.

**Table S21.** Regression coefficients, standard error (SE) and *p*-value of the second-order polynomial models for optimization of the extraction of antioxidants from *F. spiralis*, using high pressure-assisted extraction. t: extraction time (s); P: pressure (MPa); S: solvent (% of water in water:ethanol mixture); L: Linear effect; Q: Quadratic effect; 1Lby2L: interaction between the linear effect of t and the linear effect of P; 1Lby3L: interaction between the linear effect of t and the linear effect of S; 2Lby3L: interaction between the linear effect of P and the linear effect of S. Significant parameters are presented in red.

|          | <i>DPPH</i> |      |        |        |        |        | <i>FRAP</i> |        |       |       |       |        | <i>TPC</i> |        |       |       |         |        |
|----------|-------------|------|--------|--------|--------|--------|-------------|--------|-------|-------|-------|--------|------------|--------|-------|-------|---------|--------|
|          | Coeff.      | SE   | t(1)   | p      | -95,%  | +95,%  | Coeff.      | SE     | t(1)  | p     | -95,% | +95,%  | Coeff.     | SE     | t(1)  | p     | -95,%   | +95,%  |
| Interc.  | 501,12      | 9,96 | 50,33  | <0,001 | 475,52 | 526,71 | 494,82      | 184,64 | 2,68  | 0,044 | 20,19 | 969,46 | 207,80     | 154,08 | 1,35  | 0,235 | -188,27 | 603,86 |
| (1)t (L) | -0,55       | 0,01 | -46,79 | <0,001 | -0,58  | -0,52  | 0,03        | 0,22   | 0,16  | 0,879 | -0,52 | 0,59   | 0,24       | 0,18   | 1,32  | 0,244 | -0,23   | 0,71   |
| t (Q)    | 0,00        | 0,00 | 45,19  | <0,001 | 0,00   | 0,00   | 0,00        | 0,00   | 0,09  | 0,930 | 0,00  | 0,00   | 0,00       | 0,00   | -1,12 | 0,314 | 0,00    | 0,00   |
| (2)P (L) | -0,14       | 0,03 | -5,25  | 0,003  | -0,21  | -0,07  | -1,64       | 0,49   | -3,33 | 0,021 | -2,91 | -0,37  | -1,29      | 0,41   | -3,13 | 0,026 | -2,34   | -0,23  |
| P (Q)    | 0,00        | 0,00 | 21,18  | <0,001 | 0,00   | 0,00   | 0,00        | 0,00   | 2,77  | 0,039 | 0,00  | 0,00   | 0,00       | 0,00   | 3,37  | 0,020 | 0,00    | 0,00   |
| (3)S (L) | -4,84       | 0,16 | -30,39 | <0,001 | -5,25  | -4,43  | -0,60       | 2,95   | -0,20 | 0,846 | -8,20 | 6,99   | 0,77       | 2,47   | 0,31  | 0,768 | -5,57   | 7,10   |
| S (Q)    | 0,02        | 0,00 | 24,04  | <0,001 | 0,02   | 0,03   | 0,02        | 0,02   | 1,18  | 0,291 | -0,03 | 0,07   | 0,00       | 0,02   | -0,04 | 0,971 | -0,04   | 0,04   |
| 1L by 2L | 0,00        | 0,00 | -7,90  | 0,001  | 0,00   | 0,00   | 0,00        | 0,00   | 0,78  | 0,472 | 0,00  | 0,00   | 0,00       | 0,00   | 0,34  | 0,749 | 0,00    | 0,00   |
| 1L by 3L | 0,00        | 0,00 | 22,23  | <0,001 | 0,00   | 0,00   | 0,00        | 0,00   | -1,98 | 0,105 | -0,01 | 0,00   | 0,00       | 0,00   | -1,59 | 0,172 | -0,01   | 0,00   |
| 2L by 3L | 0,00        | 0,00 | -14,20 | <0,001 | 0,00   | 0,00   | 0,01        | 0,00   | 2,00  | 0,102 | 0,00  | 0,02   | 0,01       | 0,00   | 1,75  | 0,140 | 0,00    | 0,02   |

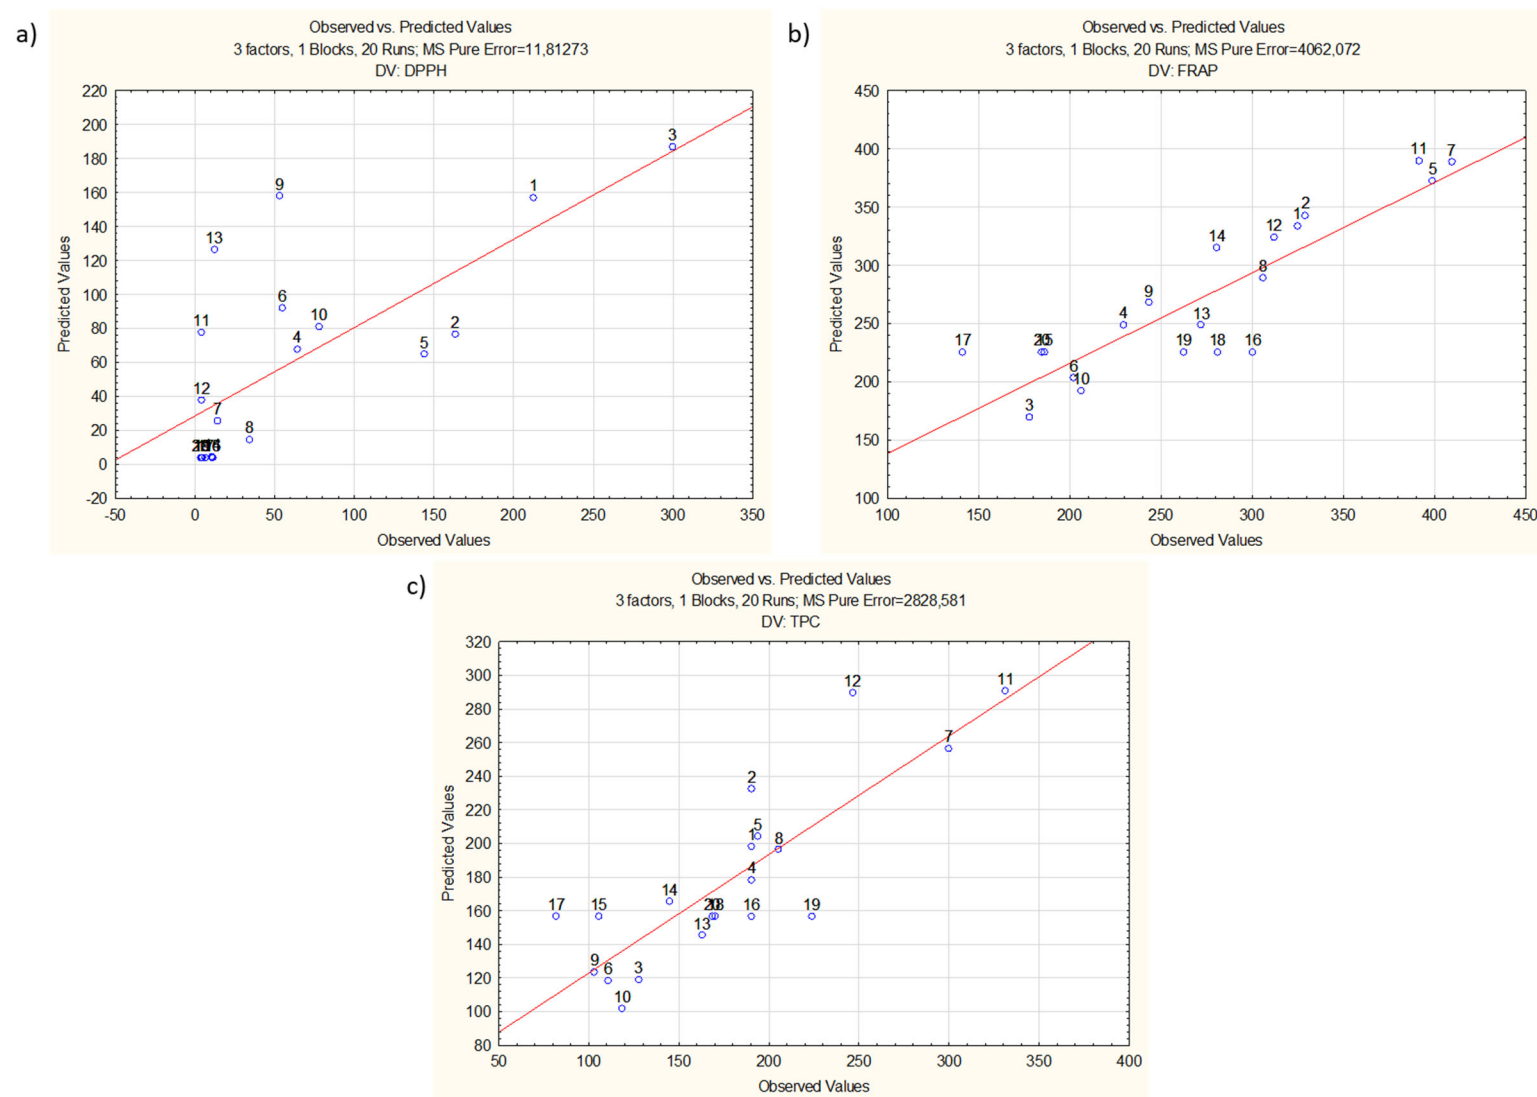

**Figure S10.** Observed vs. predicted DPPH (a), FRAP (b) and TPC (c) values for the high pressure-assisted extraction.



**Table S22.** Observed, predicted, and residual values for the high pressure-assisted extraction.

|    | <i>DPPH</i> |          |         | <i>FRAP</i> |          |        | <i>TPC</i> |          |        |
|----|-------------|----------|---------|-------------|----------|--------|------------|----------|--------|
|    | Observed    | Predictd | Resids  | Observed    | Predictd | Resids | Observed   | Predictd | Resids |
| 1  | 212,83      | 156,95   | 55,88   | 324,92      | 333,96   | -9,04  | 190,66     | 198,16   | -7,50  |
| 2  | 163,45      | 76,31    | 87,14   | 329,35      | 343,01   | -13,67 | 190,62     | 232,35   | -41,74 |
| 3  | 300,00      | 186,85   | 113,15  | 178,07      | 169,76   | 8,31   | 127,89     | 118,79   | 9,10   |
| 4  | 64,31       | 67,78    | -3,47   | 229,72      | 248,95   | -19,24 | 190,42     | 178,43   | 11,99  |
| 5  | 143,97      | 64,79    | 79,18   | 399,01      | 372,35   | 26,67  | 193,86     | 204,00   | -10,14 |
| 6  | 54,77       | 92,21    | -37,44  | 202,42      | 203,30   | -0,88  | 111,05     | 118,30   | -7,25  |
| 7  | 14,24       | 25,67    | -11,43  | 409,50      | 388,40   | 21,10  | 300,04     | 256,46   | 43,59  |
| 8  | 34,50       | 14,68    | 19,83   | 305,96      | 289,49   | 16,47  | 205,55     | 196,20   | 9,35   |
| 9  | 53,36       | 157,82   | -104,46 | 243,42      | 267,84   | -24,42 | 103,45     | 123,42   | -19,97 |
| 10 | 78,01       | 80,84    | -2,83   | 206,25      | 192,36   | 13,89  | 118,88     | 101,53   | 17,35  |
| 11 | 4,39        | 77,88    | -73,49  | 391,56      | 389,82   | 1,75   | 331,42     | 290,86   | 40,55  |
| 12 | 4,06        | 37,87    | -33,80  | 312,01      | 324,29   | -12,28 | 246,45     | 289,63   | -43,17 |
| 13 | 12,28       | 126,22   | -113,94 | 272,19      | 248,59   | 23,60  | 162,99     | 145,35   | 17,64  |
| 14 | 10,83       | 4,19     | 6,64    | 280,76      | 314,89   | -34,13 | 144,92     | 165,18   | -20,26 |
| 15 | 11,11       | 3,67     | 7,44    | 186,15      | 225,71   | -39,57 | 105,59     | 156,77   | -51,18 |
| 16 | 11,09       | 3,67     | 7,42    | 300,31      | 225,71   | 74,60  | 190,37     | 156,77   | 33,61  |
| 17 | 6,46        | 3,67     | 2,79    | 141,46      | 225,71   | -84,25 | 82,16      | 156,77   | -74,60 |
| 18 | 4,06        | 3,67     | 0,38    | 281,04      | 225,71   | 55,33  | 170,54     | 156,77   | 13,78  |
| 19 | 4,80        | 3,67     | 1,13    | 262,40      | 225,71   | 36,68  | 223,85     | 156,77   | 67,08  |
| 20 | 3,57        | 3,67     | -0,10   | 184,79      | 225,71   | -40,92 | 168,55     | 156,77   | 11,78  |
